# Supplementary material for: A novel interpretable deep learning-based computational framework designed synthetic enhancers with broad cross-species activity
Source: PubMed Central journal article supplement — Nucleic Acids Res. 2024 Oct 18;52(21):13447–68. doi: 10.1093/nar/gkae912 (PMC11602155; doi:10.1093/nar/gkae912), 2024-10-18
Supplement: gkae912_supplemental_file.pdf [file gkae912_supplemental_file.pdf]

# **A novel interpretable deep learning-based computational framework designed synthetic enhancers with broad cross-species activity**

Zhaohong Li<sup>1,2,#</sup>, Yuanyuan Zhang<sup>1,2,#</sup>, Bo Peng<sup>3,4,#</sup>, Shenghua Qin<sup>1,2,#</sup>, Qian Zhang<sup>5</sup>,  
Yun Chen<sup>1,2</sup>, Choulin Chen<sup>1,2</sup>, Yongzhou Bao<sup>1,2</sup>, Yuqi Zhu<sup>6</sup>, Yi Hong<sup>6</sup>, Binghua Liu<sup>7</sup>,  
Qian Liu<sup>7</sup>, Lingna Xu<sup>1,2</sup>, Xi Chen<sup>8</sup>, Xinhao Ma<sup>9</sup>, Hongyan Wang<sup>7</sup>, Long Xie<sup>1</sup>, Yilong  
Yao<sup>10</sup>, Biao Deng<sup>1,2</sup>, Jiaying Li<sup>11</sup>, Baojun De<sup>12</sup>, Yuting Chen<sup>12</sup>, Jing Wang<sup>1</sup>, Tian  
Li<sup>13</sup>, Ranran Liu<sup>14</sup>, Zhonglin Tang<sup>10</sup>, Junwei Cao<sup>12</sup>, Erwei Zuo<sup>1</sup>, Chugang Mei<sup>9</sup>,  
Fangjie Zhu<sup>13</sup>, Changwei Shao<sup>7</sup>, Guirong Wang<sup>1</sup>, Tongjun Sun<sup>6</sup>, Ningli Wang<sup>11</sup>,  
Gang Liu<sup>5</sup>, Jian-Quan Ni<sup>3,4,15\*</sup>, Yuwen Liu<sup>1,2,10\*</sup>

1 Shenzhen Branch, Guangdong Laboratory for Lingnan Modern Agriculture, Key  
2 Laboratory of Livestock and Poultry Multi-Omics of MARA, Agricultural Genomics  
3 Institute at Shenzhen, Chinese Academy of Agricultural Sciences, Shenzhen, 518124,  
4 China.

5 2 Innovation Group of Pig Genome Design and Breeding, Research Centre for  
6 Animal Genome, Agricultural Genomics Institute at Shenzhen, Chinese Academy of  
7 Agricultural Sciences, Shenzhen, 518124, China.

8 3 School of Basic Medical Sciences, Tsinghua University, Beijing, 100084, China

9 4 State Key Laboratory of Molecular Oncology, Beijing, 100084, China

10 5 State Key Laboratory of Mycology, Institute of Microbiology, Chinese Academy of  
11 Sciences, Beijing, 100101, China

12 6 Shenzhen Branch, Guangdong Laboratory for Lingnan Modern Agriculture,  
13 Genome Analysis Laboratory of the Ministry of Agriculture and Rural Affairs,  
14 Agricultural Genomics Institute at Shenzhen, Chinese Academy of Agricultural  
15 Sciences, Shenzhen, 518124, China

16 7 National Key Laboratory of Maricultural Biobreeding and Sustainable Goods,  
17 Yellow Sea Fisheries Research Institute, Chinese Academy of Fishery Sciences,  
18 Qingdao, Shandong 266071, China.

19 8 Shenzhen Branch, Guangdong Laboratory of Lingnan Modern Agriculture, Key  
20 Laboratory of Synthetic Biology, Ministry of Agriculture and Rural Affairs,  
21 Agricultural Genomics Institute at Shenzhen, Chinese Academy of Agricultural  
22 Sciences, Shenzhen, 518124, China

23 9 Northwest A&F University, Yangling, Shaanxi, 712100, China.

24 10 Kunpeng Institute of Modern Agriculture at Foshan, Chinese Academy of  
25 Agricultural Sciences, Foshan, 528226, China.

26 11 Beijing Institute of Ophthalmology, Beijing Tongren Eye Center, Beijing Tongren  
27 Hospital, Capital Medical University, Beijing, 100101, China.

41 12 College of Life Sciences, Inner Mongolia Agricultural University, Hohhot,  
42 010018, China.

43 13 College of JUNCAO Science and Ecology, Haixia Institute of Science and  
44 Technology, National Engineering Research Center of JUNCAO, Fujian Agriculture  
45 and Forestry University (FAFU), Fuzhou, 0350002, China.

46 14 Institute of Animal Science, Chinese Academy of Agricultural Sciences, Beijing,  
47 100193, China.

48 15 SXMU-Tsinghua Collaborative Innovation Center for Frontier Medicine, Shanxi  
49 Medical, Shanxi Medical University, Taiyuan, 030001, China.

50 # These authors contributed equally to this work.

51 \*Correspondence:  
52 Shenzhen Branch, Guangdong Laboratory for Lingnan Modern Agriculture, Key  
53 Laboratory of Livestock and Poultry Multi-Omics of MARA, Agricultural Genomics  
54 Institute at Shenzhen, Chinese Academy of Agricultural Sciences, Shenzhen, China;  
55 E-mail: liuyuwen@caas.cn  
56 School of Basic Medical Sciences, Tsinghua University, Beijing, China; E-mail:  
57 nijq@tsinghua.edu.cn  
58

59 Running title: Zhaohong Li et al. / Designing the enhancers *in silico*  
60

## 61 **Cell line culture**

62 Various cell lines were employed in this study, including Human 293T cells (provided  
63 by Dr. Guoqiang Yi), A549 cells (supplied by Dr. Songhua Cai), ARPE-19 cells (gifted  
64 from Dr. Ningli Wang), mouse C2C12 cells (acquired from Dr. Tang Zhonglin), CHO  
65 cells (received from Su'yan Biotech), 3T3 cells (provided by Dr. Tang Zhonglin),  
66 chicken DF1 cells (received from Dr. Erwei Zuo), PSKM cells (supplied by Su'yan  
67 Biotech), and PK15 cells (received from Su'yan Biotech). The specified cell lines  
68 underwent cultivation in a medium comprising 90% DMEM (Gibco, C11995500BT),  
69 10% serum (Gibco, 10270-106), and 1% penicillin/streptomycin (Gibco, 2441868) at  
70 37°C with 5% CO<sub>2</sub>. For HepG2 cells (obtained from Procell), the cultivation medium  
71 consists of 90% MEM medium (Procell, PM150410), 10% FBS (Gibco, 10270-106),  
72 and 1% penicillin/streptomycin (Gibco, 2441868). S2 cells (served by Su'yan Biotech)  
73 and SF9 cells (gifted from Dr. Guirong Wang) were cultured in a medium composed of  
74 90% Schneider's medium (Thermo Fisher, 21720024), 10% serum (Gibco, 10270-106),  
75 and 1% penicillin/streptomycin (Gibco, 2441868) at 28°C. During S2's feeding, half  
76 of the conditioned medium was substituted with an equal volume of fresh medium.  
77 K562 cells (provided by Dr. Tang Zhonglin) and bovine kidney cells (obtained from  
78 KEPU Biology) were cultured in a medium consisting of 90% RPMI Medium (Gibco,  
79 C22400500BT), 10% serum (Gibco, 10270-106), and 1% penicillin/streptomycin  
80 (Gibco, 2441868) at 37°C with 5% CO<sub>2</sub>. *Cynoglossus semilaevis* spermatogonium  
81 (provided by Dr. Changwei Shao) were suspended in a solution containing 8%  
82 Antibiotic-Antimycotic (Gibco, 15240-062) and 92% L15 medium (Solarbio, LA9510).  
83 Spermathecal tissues were dissected in an ultra-clean bench, digested with trypsin  
84 (Gibco, 25200072) for 10 minutes, and the tissue-cell mixture was transferred to 25 cm<sup>2</sup>  
85 cell culture flasks (Corning, 430639) with 4 mL of a medium consisting of 76% L15  
86 medium (Solarbio, LA9510), 20% serum (Gibco, 10270-106), and 4% Antibiotic-  
87 Antimycotic (Gibco, 15240-062). Cells were seeded in 24-well plates (Corning, 3524)  
88 and incubated at 24°C.

## 89 **Cell line transfection**

90 S2, SF9 cells: cells were cultured in 24-well plates (NEST, 702001) at a density of 2.5  
91  $\times 10^5$  cells per well. For each transfection, we used 1.5  $\mu$ l transfection Reagent  
92 (Qiagen, 301007) and 0.5  $\mu$ g plasmid. In S2 and SF9 cells, pGL3\_DSCP\_Rluc plasmids  
93 were transfected into cells for renilla luciferase expression. The ratio of firefly  
94 luciferase expression plasmid to Renilla luciferase expression plasmid was 5:1.

95 K562 Cells: cells were inoculated at a density of  $1.0 \times 10^6$  cells/ml medium. For each  
96 transfection reaction, we used 100  $\mu$ l transfection reagent,  $1.0 \times 10^6$  cells, and 2  $\mu$ g  
97 plasmid. Transfection was performed using a 4D-Nucleofector® X Unit (Lonza, AAF-  
98 1003X) with the FF120 program, and P4 transfection reagent (Lonza, PBP4-00675).

99 ARPE-19 Cells: Transfection involved  $1 \times 10^6$  cells per reaction, 0.2  $\mu$ g plasmid, and  
100 20  $\mu$ l P4 electrotransformation solution (Lonza, PBP4-00675). Transfection was carried  
101 out using a 4D-Nucleofector® X Unit (Lonza, AAF-1003X) with the CA137 program.

102 HepG2 Cells: The transfection system for a six-well plate included 8  $\mu$ l jetPRIME  
103 (Polyplus, 101000046) per well, 4  $\mu$ g plasmid, and 200  $\mu$ l jetPRIME buffer (Polyplus,  
104 101000046).

105 Human 293T, A549 cells, mouse C2C12, CHO, 3T3 cells, chicken DF1 cells, PSKM,  
106 PK15 cells, and bovine kidney bells: cultured at  $2.0 \times 10^5$  cells per well in a 24-well  
107 plate (NEST, 702001). Transfection experiments were performed with jetPRIME  
108 (Polyplus, 101000046) using 0.6  $\mu$ g plasmid, 50  $\mu$ l jetPRIME buffer (Polyplus,  
109 101000046), and 2.5  $\mu$ l jetPRIME per well.

110 *Cynoglossus semilaevis* Spermatogonium: Transfection experiments were conducted  
111 when cell confluence reached about 80%. For each well, 500 ng of plasmid was added,  
112 together with the transfection reagent Lipo8000 (Beyotime, C0533, 0.5 ml).

113 *Pichia pastoris*: 100  $\mu$ L of *Pichia pastoris* competent was thawed on ice, plasmid was  
114 added, the competent was transferred to a pre-chilled 2 mm shock cup, the parameters  
115 of the shock converter were adjusted to 1515 V, 25  $\mu$ F, 200  $\Phi$ , and the periphery of the  
116 shock cup was kept dry for electric shock. After the shock was completed, 1 mL of  
117 resuscitation solution (500  $\mu$ L YPD + 500  $\mu$ L 1 mol/L sorbitol) was mixed with the  
118 bacterial solution in the shock cup, and the bacterial solution was aspirated into an EP

119 tube, 28°C, 250 rpm/min shaker, and resuscitation was carried out for 3 hours. The  
120 thawed bacterial solution was coated onto the required screening medium plate, and  
121 monoclonal positive colonies were picked and preserved. In our *Pichia pastoris*  
122 experiments, we employed a stable transformation method which results in the random  
123 insertion of sequences into the genome. To ensure co-localization of the firefly and  
124 *Renilla luciferase* reporters within the same genomic location and to minimize  
125 variability in expression, both genes were cloned into a single plasmid. This strategy  
126 provides more consistent and reliable normalization of luciferase activity compared to  
127 separate plasmids.

## 128 **The sequence of plasmid**

129 The sequence of E-pGL3-DSCP-luc (The uppercase bases are synthetic enhancer):

```
130 ttaccaatgcttaatcagtgaggcacctatctcagcgatctgtctatttcggtcatccatagttgcctgactccccgctcgtgtaga
131 taactacgatacgggagggttaccatctggccccagtgctgcaatgataccgcgagaccacgctcaccggctccagatt
132 tatcagcaataaaccagccagccggaagggccgagcgcagaagtggctcctgcaactttatccgctccatccagtctatta
133 attggtgccgggaagctagagtaagtagttcgccagtaataagtttgcgcaacggttggcattgctacaggcatcgtgggtg
134 cagctcgtcgtttggtatggcttcattcagctccggttccaacgatcaaggcgagttacatgatccccatggtgtgcaaaa
135 aagcggtagctccttcggtcctccgatcgttgcagaagtaagtggccgagtgattactcatggttatggcagcactgc
136 ataattcttactgtcatgccatccgtaagatgctttctgtgactggtgagtactcaaccaagtcattctgagaatagtgtatgc
137 ggcgaccgagttgctcttggccgctcaatacgggataataccgcgccacatagcagaactttaaagtctcatcattgg
138 aaaacgttcttcggggcgaaaactctcaaggatcttaccgctgtgagatccagttcgatgtaaccactcgtgcaccaact
139 gatcttcagcatctttactttcaccagcgtttctgggtgagcaaaaacaggaaggcaaaatgccgaaaaaagggaataag
140 ggcgacacggaaatggtgaatactcactcttcttttcaatattattgaagcattatcagggttattgtctcatgagcggata
141 catatttgaatgatttagaaaaataaacaatagggttccgcgcacatttccccgaaaagtgccacctgacgcgccctgta
142 gcggcgcattaagcgcggcgggtgtggtggttacgcgcagcgtgaccgctacacttgccagcgccttagcggccgctcc
143 ttcgcttcttcccttcttctcggccacgttcgccgcttccccgtaagctctaaatcgggggctccctttaggggtccgatt
144 tagtctttacggcacctcgacccccaaaaacttgattagggtgatggtcacgtagtgggccatcgccctgatagacggttt
145 tcgccctttgacgttggagtccacgttcttaatagtgactctgttccaaactggaacaacactcaaccctatctcgggtctat
146 tcttttgattataagggttttggcatttcggcctattggttaaaaaatgagctgatttaacaaaaatttaacgcgaatttaaca
147 aatattaacgcttacaatttgccattcgccattcaggctgcgcaactgttgggaagggcgatcgggtcgggcctcttcgcta
148 ttacgccagcccaagctaccatgataagtaagtaataaggtacgggaggtacttgagcggccgcaataaaatattcttta
149 tttcattacatctgtgtggtttttgtgtaatcgatagtaactacatacgtctccatcaaaacaaaacgaaacaaaacaa
150 actagcaaaataggctgtccccagtgcaagtgcagtgccagaacatttctctatcgatagggtacTGATGTGACTC
151 ACATAGGCGGTGGCGTGATATGTTGTGACTCATTTCGCCGAAACGGATGA
152 CTAATGCCATATGTTATCAGTTTCCTGGAAATTTGATCACGCCATATTGTG
153 AAATCATGCGATTCCCGGATCACGTGACGGCCGGACGTGACAAGTATGAG
154 TCACTAAGTGGCGTGATCTTACGAATCACGTGATGGTCAATGTCACGTGA
155 TCGGCTGGTGAGTCAGCAATATCGTGTGATTCATTCgatctgcgatcagctcggccg
156 ggatcagcgcagcggataaaagggcgcggggtggctgagagcatcagttgtaaatgaatggtcagccgagcagac
157 gtgccgctgccttcgtaatatcctttgaataagccaactttgaaatcacaagacgcataccaacggcattccggtactgttg
```

158 taaagccacatggaagacgcaaaaacataaagaaggcccgccattctatccgctggaagatggaaccgctgga  
159 gagcaactgcataaggctatgaagagatacgcctgggttcttgaacaattgctttacagatgcacatatcaggtggaca  
160 tcaactacgctgagacttcgaaatgtccgttcggttggcagaagctatgaaacgatatgggctgaatacaatcacagaatc  
161 gtcgtatgcagtgaaaactctctcaattctttatgccggtgttggcgcgcttattatcggagttgcagttgcgcccgcaacg  
162 acatttataatgaacgtgaattgtcaacagtatgggcatttcgcagcctaccgtgggttcgtttcaaaaaggggttgc  
163 aaatttgaacgtgcaaaaaagctcccaatcatcaaaaaattattatcatggattctaaaacggattaccagggatttcagtc  
164 gatgtacacgttcgtcacatctcatctacccgggtttaatgaatacagtttgcagagtccttcgatagggacaagaca  
165 attgcactgatcatgaactcctctggatctactggctctgcctaaaggtgtcgtctgcctcatagaactgcctgcgtgagattc  
166 cgcagccagagatcctattttggcaatcaaatcattccggatactgcgattttaaagttgttccattccatcacggttttgaa  
167 tgtttactacactcggatattgatatgtggatttcgagtcgtctaatgtatagattgaagaagagctgttctgaggagcctc  
168 aggattacaagattcaaagtgcgctgctgggcccaaccctattctcttctcccaaaaagcactctgattgacaaatacagttc  
169 atctaatttacgaaattgcttctgtggcgtcctcctctaaaggaagtcggggaagcgggttccaagaggttccatctgc  
170 caggtatcaggcaaggatagggctcactgagactacatcagctattctgattacaccgaggggatgataaacggggc  
171 gcggtcggtaaaagtgttccattttgaagcgaaggttggatctggataccgggaaaacgctggcggttaatacaagag  
172 gcgaactgtgtgagaggtcctatgattatgtccggttatgtaacaatccggaagcgaccaacgccttgattgacaagga  
173 tggatggctacattctggagacatagcttactgggacgaagacgaacactctctcatcgttgaccgctgaagtctctgataa  
174 gtacaaaaggctatcaggtggctcccgtgaattggaatccatctgtccaacaccccaacatcttcgacgcaggtgtcga  
175 ggtctcccagcagatgacgccggtgaactcccgccgctgttgtttggagcacggaaagacgatgacggaaaaaga  
176 gatcgtggattacgtcggcagtaagtaacaaccgcgaaaaagtgcgcggaggagttgtttgtgacgaagtaccgaa  
177 aggtctaccggaaaactcagcgaagaaaaatcagagagatcctataaaggccaagaagggcggaaaagatcggcgt  
178 gtaattctagatcggggcggccgcttcgagcagacatgataagatacattgatgagttggacaaaccacaactag  
179 aatgcagtgaaaaaatgctttattgtgaaattgtgatgctattgctttattgtaaccattataagctgcaataaacaagttaac  
180 aacaacaattgcattcatttatgtttcaggttcagggggaggtgtgggaggtttttaaagcaagtaaaaccttacaatgtg  
181 gtaaaaatcgaataaggatccgtcagcagatgcccttgagagcctcaaccagtcagctcctccgggtggcgcggggc  
182 gactatcgtcggcacttatgactgtctttatcatgcaactcgtaggacaggtgccggcagcgtcttccgcttctcgc  
183 tcaactgactcgtcgcgctcggctgttcggctcggcgcgagcggatcagctcactcaaaggcggtaatacggttatccacag  
184 aatcaggggataacgcaggaaagaacatgtgagcaaaaggccagcaaaaaggccaggaaccgtaaaaaggccgctgtg  
185 ctggcgttttccataggctccgccccctgacgagcatcaaaaaatcagcgtcaagtcagaggtggcgaaaccgac  
186 aggactataaagataaccaggcgtttccccctggaagctccctcgtgcgctcctgttccgacctgcccgttaccggatac  
187 ctgtccgctttctccctcgggaagcgtggcgtttctcatagctcagcgtgtaggtatctcagttcgggtgtaggtcgtcgt  
188 ccaagctgggctgtgtgcacgaacccccgttccgcccagcctgcgccttatccggttaactatcgtttagtccaacc  
189 cggtaagacacgacttatcgcactggcagcagccactggtaacaggattagcagagcaggtatgtaggcgggtgctaca  
190 gagttctgaagtgtggcctaactacggctacactagaagaacagatttggatctcgcgctcgtgtagccagttacctc  
191 ggaaaaagagttgtagcttctgacggcaacaaccaccgctgtagcgggtgtttttgttgcaagcagcagattac  
192 gcgcagaaaaaaggatctcaagaagatccttctacggggtcgtcagcgtcagtggaacgaaaactcacgtaa  
193 gggatttggctatgagattatcaaaaaggatctcacctagatcctttaaattaaaaatgaagtttaaatcaatctaaagtata  
194 tatgagtaaaactggtctgacag

195 The sequence of E-CAG-luc (The uppercase bases are synthetic enhancer and CAG  
196 promoter):

197 catgcaagctgatccggctgtaacaaagcccgaaggaagctgagttggctgctgccaccgctgagcaataactagcat  
198 aacccttggggcggccgcttcgagcagacatgataagatacattgatgagtttgacaaccacaactagaatcagtg  
199 aaaaaatgctttattgtgaaattgtgatgctattgctttattgtaaccattataagctgcaataaacaagttaacaacaat  
200 gcaatcatttatgttcaggttcagggggagatgtgggaggtttttaaagcaagtaaaaccttacaatgtggtaaaatcga  
201 attttaacaaaatattaacgcttacaatttctgatgcgggtatttctcttacgcatctgtcgggtttcacaccgatacgcgg

202 atctgcgcagcaccatggcctgaaataacctctgaaagaggaacttggttaggtacctaccgggtgggagcggaggt  
203 ggcggatcaggtggcggaggctccggagggattgaacaagatggattgcacgcaggttccggccgcttgggtggag  
204 aggctattcggctatgactgggcacaacagacaatcggctgctctgatgccgccgtgtccggctgacgcagggggc  
205 cccggttcttttgcagaccgacctgtccgggtccctgaatgaactgcaggacgaggcagcgggctatcgtggctggc  
206 cagcagggggcgttcttgcgcagctgtgctgcagctgtgactgaagcgggaaggactggctgctattgggcgaagtgc  
207 cggggcaggatctcctgtcatctcacttgcctctgccgagaaagtatccatcatggctgatgcaatcgggcggtgcatac  
208 gcttgatccggctacgtgccattcgaccaccaagcgaacatcgcatcgagcagcagctactcggatggaagccggct  
209 ttgtcgtacaggatgatctggacgaagagcatcaggggctcgcgccagccgaactgttcgccaggctcaaggcgcgcat  
210 gcccgacggcgaggatctcgtcgtgacccatggcgatgcctgcttggcgaatatcatggtggaanaatggccgcttttctgg  
211 attcatcactgtgtggcggctgggtgtggcggaccgctatcaggacatagcgttggctaccgctgatattgtgaagagctt  
212 gggcggcgaatgggctgaccgcttctcgtgctttacggtatcggcgtcccattcgagcgcacgccttctatgccttct  
213 tgacgagttcttctgagcgggactctgggggtcgaatgaccgaccaagcgcgcccaacctgccatcacgatggccgca  
214 ataaaaatctttattttcattacatctgtgtgtgtttttgtgtgaatcgatagcgataaggatctcttgcgcttgcgtttccct  
215 tgtccagatagcccagtagctgacattcatccgggtcagcaccgttctcgggactggctttctacgtaatggtttcttagac  
216 gtcaggtggcacttttcggggaaatgtgcgcggaaccctattgtttttctaaatacattcaaatatgatccgctcatga  
217 gacaataaccctgataaatgcttcaataatattgaaaaaggaagagtatgagtattcaacatttccgtgtcgccttattccctt  
218 tttgcggcattttgccttctgttttctcaccagaaacgctggtgaaagtaaaagatgctgaagatcagttgggtgcacga  
219 gtgggttacatgaactggatctcaacagcggtaagatccttgagagtttcccccgaagaacgtttccaatgatgagcac  
220 ttcaaaagtctctatgtggcgcggtattatcccgtattgacgccgggaagagcaactcggctgccgcatacactattctca  
221 gaatgacttgggtgagtactaccagtcacagaaaagcatcttaccggatggcatgacagtaagagaattatgcagtctgcc  
222 ataaccatgagtataactgcggccaacttactctgacaactatcggaggaccgaaggagctaaccgctttttgcaca  
223 acatgggggatcatgtaactgccttgatcgttgggaaccggagctgaatgaagccataccaaacgacgagcgtgacacc  
224 acgatgcctgtagcaatggcaacaacgttgcgcaactattaactggcgaactacttacttagcttcccggcaacaattaat  
225 agactggatggaggcggataaaagttgcaggaccacttctgcgctcggccttccggctggtggtttattgctgataaatct  
226 ggagccggtgagcgtgggtctcgcggtatcattgcagcactggggccagatggttaagccctcccgatcgtagtattctac  
227 acgacggggagtcaggcaactatggatgaacgaaatagacagatcgctgagataggtgcctcactgattaagcattggtg  
228 attcgaatgaccgaccaagcgcgcccaaccggtatcagctcactcaaaggcggtataacggttatccacagaatcagg  
229 ggataacgcaggaaagaacatgtgagcaaaaggccagcaaaaggccaggaaccgtaaaaaggccgcttgcgtggcgtt  
230 ttccataggctccgccccctgacgagcatcacaanaatcgcagctcaagtcagaggtggcgaaccggacaggactat  
231 aaagataaccaggcgtttcccctggaagctccctcgtgcgctctcctgttccgacctgcccgttaccggatactgtccgc  
232 ctttctcccctgggaagcgtggcgtttctcatagctcacgctgtaggtatctcagttcgggtgtagtgcgttcccaagctg  
233 ggctgtgtgcagaaacccccgtcagcccaccgctgcgcttaccggtaactatcgtcttgagtccaaccggtaaga  
234 cacgactatcgccactggcagcagccactggtaaacaggattagcagagcaggtatgtaggcggtgctacagagttcttg  
235 aagtggtagcctaactacggctacactagaaggacagtatttggatctcgcgctctgctgaagccagttacctcggaaaaa  
236 gagttgtagctcttgatccggcaacaaccaccgctggtagcgggtgtttttgttgaagcagcagattacgcgcaga  
237 aaaaaaggatttcaagaagatcctttgatctttctacggggtctgacgctcagtggaacgaaaactcacgttaagggattttg  
238 gtcatgagattatcaaaaaggatctcacttagatcctttatagtcgggaaatacaggaacgcagcgtggatggccctcgc  
239 tgggatggtgaaaccatgaaaaatggcagcttcaagtgatgaaagtggggtaatgtggcctgtaccctctggttgcataggt  
240 attcatacggtaaaaattatcaggcgcgattgcggcagttttcgggtggtttgttccattttacctgtctgctgccgtgatc  
241 cgctgaacgcgttttagcgggtgcgtacaattaaggattatgtaaatccactactgtctgcctcgtagccatcgagataaa  
242 ccgagctactccggccacgatcgtccggcgtGAATTCCATCGCGTGATCGCGATCGGATG  
243 ACTCGGCTGAGTCACCGGATGTGACTCAGCTCTGGTTCTATGATTCATGCA  
244 GGAAATGACTCATTGAGTCATTCTTGGAAAGTGGCGTGACTGTCTGGTGGC  
245 GTGACTTCTGGAATGTGACTCAGCGGAAGCTCATGACTCATTCTGGAA

246 ATCGTACGATGCGAGTCACGTAGGCCTACGTGACGGTGAATCATACTACG  
247 TGGCGTGATACGGAGGAAATGACTCagatctaccTCGAGGTGAGCCCCACGTTC  
248 TGCTTCACTCTCCCCATCTCCCCCCCCCTCCCCACCCCAATTTTGTATTTAT  
249 TTATTTTTTAATTATTTTGTGCAGCGATGGGGGCGGGGGGGGGGGGGGGGG  
250 CGCGCGCCAGGCGGGGCGGGGCGGGGCGAGGGGCGGGGCGGGGCGAGG  
251 CGGAGAGGTGCGGCGGCAGCCAATCAGAGCGGCGCGCTCCGAAAGTTTC  
252 CTTTTATGGCGAGGCGGCGGCGGCGGCGGCCCTATAAAAAGCGAAGCGC  
253 GCGGCGGGCGGGAGTCGCTGCGCGCTGCCTTCGCCCCGTGCCCCGCTCCG  
254 CCGCCGCTCGCGCCGCCCGCCCCGGCTCTGACTGACCGCGTTACTCCAC  
255 AGGTGAGCGGGCGGGACGGCCCTTCTCCTCCGGGCTGTAATTAGCGCTTG  
256 GTTTAATGACGGCTTGTCTTTCTTTCTGTGGCTGCGTGAAAGCCTTGAGGGG  
257 CTCCGGGAGGGCCCTTTGTGCGGGGGGAGCGGCTCGGGGGGTGCGTGCGT  
258 GTGTGTGTGCGTGGGGAGCGCCGCGTGCGGCTCCGCGCTGCCCGGCGGCT  
259 GTGAGCGCTGCGGGCGCGGCGCGGGGCTTTGTGCGCTCCGCAGTGTGCGC  
260 GAGGGGAGCGCGGCCGGGGCGGTGCCCGCGGTGCGGGGGGGGCTGCG  
261 AGGGGAACAAAGGCTGCGTGCGGGGTGTGTGCGTGGGGGGGTGAGCAGG  
262 GGGTGTGGGCGCGTCCGGTCCGGGCTGCAACCCCCCTGCACCCCCCTCCCC  
263 GAGTTGCTGAGCACGGCCCGGCTTCGGGTGCGGGGCTCCGTACGGGGCGT  
264 GGC GCGGGGCTCGCCGTGCCGGGCGGGGGGTGGCGGCAGGTGGGGGTGC  
265 CGGGCGGGGCGGGGCCGCCTCGGGCCGGGGAGGGCTCGGGGGAGGGGCG  
266 CGGCGGCCCCCGGAGCGCCGGCGGCTGTGAGGCGCGGCGAGCCGCAGC  
267 CATTGCCTTTTATGGTAATCGTGCGAGAGGGCGCAGGGACTTCCTTTGTCC  
268 CAAATCTGTGCGGAGCCGAAATCTGGGAGGCGCCGCCGACCCCCCTTAG  
269 CGGGCGCGGGGCGAAGCGGTGCGGCGCCGGCAGGAAGGAAATGGGCGGG  
270 GAGGGCCTTCGTGCGTCGCCGCGCCGCGTCCCCTTCTCCCTCTCCAGCCT  
271 CGGGGCTGTCCGCGGGGGGACGGCTGCCTTCGGGGGGGACGGGGCAGGG  
272 CGGGGTTCCGGCTTCTGGCGTGTGACCGGCGGCTCTAGAGCCTCTGCTAAC  
273 CATGTTTCATGCCTTCTTCTTTTTCTACAGacctgcagccaagcttggcaatccggtactgtt  
274 gtaaagccacatggaagatgcaaaaacattaagaagggccagcgccattctaccactcgaagacgggaccg  
275 gcgagcagctgcacaaagcatgaagcgctacgccttgggtgcccggcaccatcgcttaccgacacatatcgaggt  
276 ggacattacctacgccgagfacttcgagatgagcgcttcggtggcagaagctatgaagcgctatgggctgaatacaaacca  
277 tcggatcggtgtgagcgagaatagcttgcagttctcatgcccgttgggtgcccgttcatcggtgtggtgtgccc  
278 cagctaacgacatctacaacgagcgagctgctgaacagcatgggcatcagccagcccaccgtctattcgtgagcaa  
279 gaaagggctgcaaaagatcctcaacgtgcaaaagaagctaccgatatacaaaagatcatcatgtagcaagaccg  
280 actaccagggcttcaaaagcatgtacacctcgtgacttccatttgcaccggctcaacgagtagacttcgtgcccga  
281 gagcttcgaccgggacaaaacatcgccctgatcatgaacagtagtgagcattgcccagggtgtagccctac  
282 cgcaccgaccgcttgtgtccgattcagtcagtcgcccgcacccatcttggcaaccagatcatccccgacaccgctatcct  
283 cagcgtgggtgccatttaccacggcttcggcatgttaccacgctgggctacttgatctcgggcttccgggtcgtgctcatgt  
284 accgcttcgaggaggagctattcttgcgcagcttgaagactataagattcaatctgcctgctgtgcccacactattagct  
285 tcttcgtaagagcactctcatcgacaagctacgacctaagcaacttgcacgagatcggcagcggcgggggcgccgctcagc  
286 aaggaggtaggtgagggcgtggccaaacgcttccacctaccagcattccggcaggttacggcctgacagaacaacc  
287 agcgcattctgatcaccgggaaggggacgacaagcctggcgagtaggcaaggtggtgccccttctcagggtaagg  
288 tgggtgacttgacaccggtaagacactgggtgtgaaccagcgcgggcgagctgtgctccgtggcccatgatcatgag  
289 cggctacgttaacaaccccgaggtacaaacgctctcatcgacaaggacggctggctgcacagcggcgacatcgctac



290 tgggacgaggacgagcacttctcatcgtggaccggctgaagagcctgatcaatacaagggtaccaggtagccccag  
291 ccgaactggagagcctcctgctgcaacaccccacatcttcgacgccggggtgccggcctgcccgacgacgatccg  
292 gcgagctgcccgccgagtcgctgctgctggaacacggtaaacatgaccgagaaggagatcgtggactatgtggccag  
293 ccaggttacaaccccaagaagctgcgcggtggtgttctgctggacgaggtgcctaaaggactgaccggcaagtgg  
294 acgcccgaagatccgcgagattctattaaggccaagaaggcgcaagatcgccgtgaattctagttgtaaacgag  
295 ctcgctagcctcgagtctagagtcgacctgcagg

296 The sequence of pGL3-DSCP-Rluc (The uppercase bases are Renilla luciferase reporter  
297 gene):

298 ttaccaatgcttaatcagtgaggcacctatctcagcgatctgtctatttcgttcatccatagttgcctgactccccgctgtaga  
299 taactacgatacgggagggcttaccatctggccccagtgctgcaatgataccgcgagaccacgctcaccggctccagatt  
300 tatcagcaataaaccagccagccggaaggccgagcgcagaagtggctcctgcaactttatccgctccatccagtctatta  
301 attgttccgggaagctagagtaagtagttccagtaataagtttgcgcaacggttgcattgctacagggatcgtggtg  
302 cagctcgtcgtttggtatggcttaccagctccggttccaacgatcaaggcgagttacatgatccccatggttgcaaaa  
303 aagcggtagctccttcggctcctccgatcgttgcagaagtaagttggccgagtggtatcactcatggttatggcagcactgc  
304 ataattcttactgtcatgccatccgtaagatgctttctgtgactggtgagtactcaaccaagtcattctgagaatagtgtatgc  
305 ggcgaccgagttgctcttccccggcgtcaatacgggataataccgcgccacatagcagaactftaaaagtgctcatattgg  
306 aaaacgttcttcggggcgaaaactcgaagatctaccgctgtgagatccagttcgatgtaaccactcgtgcaccaact  
307 gatcttcagcatctttacttaccagcgtttctgggtgagcaaaaacaggaaggcaaaatgccgcaaaaagggaataag  
308 ggcgacacggaaatgttgaatactcactcttctttcaatattattgaagcatttatcagggttattgtctcatgagcggata  
309 catattgaaatgatttagaaaaataacaaataggggttccgcgcacatttccccgaaaagtgccacctgacgcgccctgta  
310 gcggcgcattaagcgcggcgggtgtggtggttaccgcgcagcgtgaccgctacacttgcagcgccttagcggccgctcc  
311 tttcgtttcttcccttcttctcgcacgttcgccggcttccccgtaagctctaaatcgggggtccctttaggggtccgatt  
312 tagtgcttacggcacctcgacccccaaaaacttgattaggggtgatggtcacgtagtgggccatgcctgatagacggttt  
313 ttcgccctttgacgttggagtcacgttcttfaatagtgactcttgtccaaactggaacaacactcaacctatctcggctctat  
314 tctttgattataagggatttgcgatttccgctattggttaaaaatgagctgatttaacaaaaattaacgcgaatttaaca  
315 aatattaacgcttacaatttgcattcgcattcaggctgcgcaactgttgggaaggcgatcgggtcggggcctcttcgcta  
316 ttacgccagcccaagctaccatgataagtaagtaataaagggtacgggaggtacttggagcggccgcaataaaatatttta  
317 tttcattacatctgtgtgttggttttgtgtgaatcgatagtagtactaacatcgcctctccatcaaaacaaaacgaaacaa  
318 actagcaaaaataggctgtcccagtgcaagtgagggtgccagaacatttctctatcagataggtacgatctgcgatcagctc  
319 gcccggggatcgagcgcagcgggtataaaaggcgccggggtggctgagagcatcagttgtgaatgaatgttcgagccga  
320 gcagacgtccgctgccttgtaataatccttgaataagccaacttgaatcacaagacgcataccaacggcattccggta  
321 ctgttgtaaaagccaccATGACTTCGAAAGTTTATGATCCAGAACAAGGAAACGG  
322 ATGATAACTGGTCCGCAGTGGTGGGCCAGATGTAAACAAATGAATGTTCT  
323 TGATTCATTTATTAATTATTATGATTCAGAAAAACATGCAGAAAATGCTGT  
324 TATTTTTTTACATGGTAACGCGGCCTCTTCTTATTTATGGCGACATGTTGTG  
325 CCACATATTGAGCCAGTAGCGCGGTGTATTATACCAGACCTTATTGGTATG  
326 GGCAAATCAGGCAAATCTGGTAATGGTTCTTATAGGTTACTTGATCATTAC  
327 AAATATCTTACTGCATGGTTTGAACCTCTTAATTTACCAAAGAAGATCATT  
328 TTTGTCGGCCATGATTGGGGTGCTTGTGGCATTTCATTATAGCTATGAG  
329 CATCAAGATAAGATCAAAGCAATAGTTCACGCTGAAAGTGTAGTAGATGT  
330 GATTGAATCATGGGATGAATGGCCTGATATTGAAGAAGATATTGCGTTGA  
331 TCAAATCTGAAGAAGGAGAAAAAATGGTTTTGGAGAATAACTTCTTCGTG  
332 GAAACCATGTTGCCATCAAAAATCATGAGAAAGTTAGAACCAGAAGAATT  
333 TGCAGCATATCTTGAACCATTCAAAGAGAAAGGTGAAGTTCGTCGTC

334 CATTATCATGGCCTCGTGAAATCCCGTTAGTAAAAGGTGGTAAACCTGAC  
335 GTTGTACAAATTGTTAGGAATTATAATGCTTATCTACGTGCAAGTGATGAT  
336 TTACCAAAAATGTTTATTGAATCGGACCCAGGATTCTTTTCCAATGCTATT  
337 GTTGAAGGTGCCAAGAAGTTTCCTAATACTGAATTTGTCAAAGTAAAAGG  
338 TCTTCATTTTTTCGCAAGAAGATGCACCTGATGAAATGGGAAAATATATCA  
339 AATCGTTCGTTGAGCGAGTTCTCAAAAATGAACAATAAttctagagtcggggcggcc  
340 ggccgcttcgagcagacatgataagatacattgatgagttggacaaaccacaactagaatgcagtgaaaaaatgctttatt  
341 tgtgaaatttgtgatgctattgcttatttgaaccattataagctgcaataaacaagttaacaacaacaattgcattcattttatgtt  
342 tcagggtcagggggaggtgtgggaggtttttaaagcaagtaaaacctctacaatgtggtaaaatcgataaggatccgctc  
343 accgatgcccttgagagcctcaaccagtcagctcctccgggtgggcgcggggcatgactatcgtcggcacttatgac  
344 tctctctttatcatgcaactcgtaggacaggtgccggcagcgcctctccgctcctcgtcactgactcgtcgcgctcggtc  
345 ttgggtcgggcgagcgggtatcagctcactcaaaggcggtaatacgggtatccacagaatcaggggataacgcaggaaag  
346 aacatgtgagcaaaaggccagcaaaaggccaggaaccgtaaaaaggccgctgtgctggcgttttccataggctccgccc  
347 ccctgacgagcatcaaaaaatcgacgctcaagtcagaggtggcgaacccgacaggactataaagataaccaggcgttcc  
348 cccctggaagctccctcgtgcgctcctgttccgacctgccgttaccggatacctgtccgctttctccctcgggaagc  
349 gtggcgtttctcatagctcacgctgtaggtatctcagttcgggtgtaggtcgttcgctccaagctgggctgtgtgcacgaacc  
350 ccccgctcagcccagcctcgtgccttatccgtaactatcgtcttgagtcacaaccggtaagacagacttatccactg  
351 gcagcagccactggtaacaggattagcagagcaggtatgtaggcgggtctacagagttcttgaagtgggtggcctaacta  
352 cggctacactagaagaacagtatttggatctgcgctcgtgaagccagttacctcggaaaaagagttggtagctcttcat  
353 ccggcaaaacaaccaccgctggtagcgggtgtttttgttgaagcagcagattacgcgcagaaaaaaaggatctcaag  
354 aagatcctttgatctttctacgggtctgacgctcagtggaacgaaaactcacgtaagggttttggatcatgattatcaaa  
355 aaggatcttcactagatccttttaataaaatgaagtttaaatcaatctaaagtatatatgagtaaacctggctgacag  
356 The sequence of E-HIS-RLuc-luc plasmid (The uppercase bases are synthetic enhancer):  
357 ttaccaatgcttaacagtgaggcacctatctcagcagatctgtctatttcgttcatccatagttgctgactccccgctgtaga  
358 taactacgatacgggagggccttaccatctggccccagtgctgcaatgataccgcgagaccacgctcaccggctccagatt  
359 taccagcaataaaccagccagccggaaggccgagcgcagaagtggctcctgcaactttaccgctccatccagcttatta  
360 attgttccgggaagctagagtaagtagttcggcagtaaatggttgcgaacgttggcattgctacagggatcgtgggtg  
361 cacgctcgtcgtttggatggcttattcagctccgggtccaacgatcaaggcgagttacatgatccccatgttgtgcaaaa  
362 aagcggtagctcctcggctcctccgatcgttgcagaagtaagttggccgagtggtatcactcatggtatggcagcactgc  
363 ataattcttactgtcatgccatccgtaagatgctttctgtgactggtgagtactcaaccaagtcattctgagaatagtgtatgc  
364 ggcgaccgagttgctccttcccggcgtcaatacgggataataccgcgccacatagcagaactttaaagtgtcatcattgg  
365 aaaacgttctcggggcgaaaactcaaggatctaccgctgttgatccagttcgtatgaaccactcgtgcaccaact  
366 gatcttcagcatctttacttccaccagcgtttctgggtgagcaaaaacaggaaggcaaaatgccgcaaaaaagggaataag  
367 ggcgacacggaaatgttgaatactcactcttcttttaataattattgaagcatttatcagggttattgtctcatgagcggata  
368 catatttgaatgtatttagaaaaataaacaataggggtccgcgcacattccccgaaaagtgccacctgacgcgcctgta  
369 gcggcgcattaagcgcggcgggtgtggtgggttacgcgcagcgtgaccgctacactgccagcgccttagcggccgctcc  
370 tttcgtttctccttctctcgcacgttcgcccgtttccccgtaagctctaaatcgggggctccctttaggggtccgatt  
371 tagtgcttacggcacctcgacccccaaaaacttgattaggggtgatggtcacgtagtgggccatgcctgatagacggttt  
372 ttgccctttgacgttggagtccacgttcttaataagtgactcttgcctcaaacctggaacaacactcaacctatctcggctat  
373 tcttttgattataagggttttggcatttcggcctattggttaaaaatgagctgatttaacaaaaatftaacgcgaatttaaca  
374 aatattaacgcttacaatttgcattcgcattcaggctcgcgaactgttgggaaggcgcgatcgggtcgggctcttcgcta  
375 ttacgccagcccaagctaccatgataagtaagtaataaagggtacgggaggtacttgagcggccgcgagctcggccgg  
376 ggatcagcgcagcgggtataaaaggcgcggggtggctgagagcatcagttgtgaatgaatgttcgagccgagcagac  
377 gtgccgctgccttcgttaatatcctttgaataagccaactttgaatcacaagacgataccaacatgactcgaagtttatga

378 tccagaacaaaggaaacggatgataactggtcgcagtggtgggcccagatgtaacaaatgaatgttcttgattcatttatta  
379 attattatgattcagaaaaacatgcagaaaaatgctgttattttttacatggtaacgcggcctctcttattatggcgacatgtgt  
380 gccacattaggccagtagcgcggtgtattataccagaccttattggatgggcaaatcaggcaaatctggtaaatggtctta  
381 taggttacttgatcattacaaatatcttactgcatggttgaacttcttaatttaccaaagaagatcattttgtcggccatgattgg  
382 ggtgcttgttggcatttcattatagctatgagcatcaagataagatcaaagcaatagttcacgctgaaagtgtagtagatgta  
383 ttgaatcatgggatgaatggcctgatattgaagaagatattgcgttgatcaaatctgaagaaggagaaaaaatggtttggag  
384 aataacttctcgtggaaccatgtgccatcaaaaatcatgagaagttagaaccagaagaatgtgcagcatatcttgaacca  
385 tcaaagagaaaagggtgaagttcgtcgtccaacattatcatggcctcgtgaaatcccgttagtaaaagggtgtaaacctgacgt  
386 tgtacaaattgtaggaattataatgcttactacgtgcaagtgatatttaccaaaaatgtttattgaatcggaccaggattctt  
387 ttccaatgctattgtgaaggtgccaagaagtttctaactgaattgtcaaaagtaaaagggtcttattttcgaagaagatg  
388 cacctgatgaaatgggaaaaatatacaaatcgttcgttgagcaggttctcaaaaatgaacaataaagatctgcaataaaatc  
389 tttattttcattacatctgtgtgttggttttgtgtgaatcgatagtaactacatcgctctccatcaaaacaaaacgaacaaaac  
390 aaactagcaaaaataggctgtccccagtgcaagtgcaagtgccagaacatttctctatcgataggtgCATCGCGTGA  
391 TCGCGATCGGATGACTCGGCTGAGTCACCGGATGTGACTCAGCTCTGGTT  
392 CTATGATTCATGCAGGAAATGACTCATTGAGTCATTCTTGGAAGTGGCGTG  
393 ACTGTCTGGTGGCGTGACTTCCTGGAATGTGACTCAGCGGAAGCTCATGA  
394 CTCATTCTGGAATCGTACGATGCGAGTCACGTAGGCCTACGTGACGGT  
395 GAATCATACTACGTGGCGTGATACGGAGGAAATGACTCagatctgcgatcgagctcg  
396 cccggggatcgagcgcagcgggtataaaaggcgcgggggtggctgagagcatcagttgtaaatgaatgttcgagccgag  
397 cagacgtcccgtgccttcgtaaatccttgaataagccaactttgaatcacagacgcatacacaacggcattccggtac  
398 tgttgtaaaagccaccatggaagacgcaaaaaacataaagaaaggcccggcgcaccattctatccgctggaagatggaacc  
399 gctggagagcaactgcataaggctatgaagatacgcctggttctggaacaattgcttttacagatgcacatcagagg  
400 tggacatcacttacgctgagtacttcgaaatgtccgttcggttggcagaagctatgaaacgatatgggctgaatacaaatcac  
401 agaatcgtcgtatgcagtgaaaactctctcaattctttatccgggtgttgggcgcttatttatcggagttgcagttgcgccc  
402 cgaacgacattataatgaacgtgaattgctcaacagatgggcatttcgacgctaccgtggtgttcgttccaaaagggg  
403 ttgcaaaaaattttgaacgtgcaaaaaagctcccaatcatcaaaaaattattatcatggattctaaaacggattaccagggg  
404 tttcagtcgatgtacagttcgtcacatctcatctcctcccgttttaataatgaatacgttttggccagagtccttcgatagggg  
405 caagacaattgcactgatcatgaactcctctggatctactggtctgcctaaagggtgctgctctgcctcatagaactgcctgcgt  
406 gagattctcgcagatccagagatcctattttggcaatcaaatcattccggatactgcgattttaagtgtttccattccatcacg  
407 gttttggaatgttactacactcggatattgatatgttgatttcgagtcgtcttaatgtatagatttgaagaagagctgtttctgag  
408 gagcctcaggattacaagattcaaaagtgctgctggtgccaaccctattctcctctcgcbaaaagcactctgattgacaa  
409 atacgatttatctaatttacacgaaattgcttctgggtggcgtcccctctctaaggaagtcggggaagcgggtgccaagaggt  
410 ccatctgccaggtatcaggcaaggatagggctcactgagactacatcagctattctgattacaccgagggggatgataaa  
411 ccgggcgcggctcgtaaaagtgttccatttttgaagcgaaggttgggatctggataccgggaaaacgctgggcgttaac  
412 aaagaggcgaactgtgtgtgagaggtcctatgattatgtccggttatgtaacaatccggaagcgaccaacgccttgattga  
413 caaggatggatggctacattctggagacatagcttactgggacgaagacgaacacttctcatcgttgaccgcctgaagtct  
414 ctgattaagtacaaaggctatcaggtggctcccgtgaattggaatccatcttctccaacaccccaacatcttcgacgcag  
415 gtgtcgcaggtcttcccacgatgacgccggtgaacttcccgcgccgttgtgtttggagcacggaaagacgatgacgg  
416 aaaaagagatcgtggattacgtgccagtcagtaacaaccgcgaaaaagttgcgcggaggagtgtgtttgtggacgaa  
417 gtaccgaaaggtcttaccggaaaactcagcgaagaaaaatcagagagatcctataaaggccaagaagggcggaag  
418 atcgcctgttaattctagagtcggggcggccggccttcgagcagacatgataagatacattgatgagtttgacaacc  
419 acaactagaatgcagtgaaaaaatgctttattgtgaaattgtgatgctattgctttatttgaaccattataagctcaataaa  
420 caagttaacaacaacaattgcattcattttatgttccaggttcagggggaggtgtgggaggtttttaaagcaagtaaacctct  
421 acaaatgtgtaaaatcagataaggatccatgacatttcccttctacctgcatacgaaggtgtgcagagtttgataaattcctt

422 agtttgtaggaaaagccgtgttcctatgctgctgaccagctgcacaacctgatcaagttcactcaatcgactgagctca  
423 agttaatgtgcaagttgagtcacccgttacagaggaccaatlttgaggagctgatcgacaacctgctcaagttgtacaataatg  
424 gtatcaatgaagtgttttgacctaagttggcagaaagagttgtccaaaggatgatcccaggcgcaggggtatctatagg  
425 accctggttgataaagttgcatccttgcggcctaagctagtagtgcctgtgccttttctctccactggggcgattgaaaagttc  
426 actaatggcggtagtagaactgtttatgcttttctgagaccgcaaagttggtagatgtgacttccactgttctctggtataat  
427 cccattattgatgctcggcaattgactactgaatacgaacttctgaagatgtcaaaaagttccctgtcagtgaatlttgtgg  
428 cgttttgactactgaccgccccgatggctattcactactttggggctgactcttcaactcgttgggctggtgactcgt  
429 caaaaagctattccggaggctataaggacacaaactggagctaccaatctcgtcgtcacggttgtggtataaagggtct  
430 acatctggagcaactcaaaagttgctgggtatcgaattggattgtgatggagactgcttgaatlttgggtgaacaaacagg  
431 tgttggtttctgacttggacgcacttctgtttggccaatcaaaaggtcttagagccatggaagccacttggggatcgt  
432 aagagcaatgctccagaaggttctatacacaacggttattgacgacgaagtttgtgaacgctaaaattaggagggaagc  
433 tgatgaactgcagaagctaaatccaaggaagatagcctgggaatgtgctgacttattttatttgcattagtagatgtcc  
434 aagtacggtgtgacgttggacgaggtggagagaacctggatataagtcctaaaggtcactagaaggaaaggagatg  
435 ccaagccaggatacaccaaggaacaacctaaagaagaatccaacctaaagaagtcccttctgaaggtcgtattgaattgt  
436 gcaaaattgacgttctaaaggcctcctcacaagaaattgaagatgcccttctcgtcctatccagaaaacggaacagattatg  
437 gaattagtcaaaccaattgtcgacaatgtctcaaaaaggtgacaaagccctttagaactaactccaagtttagtgagtc  
438 gcttgaagacacctgtttagaagctccttcccagaggaacttatgcaattgccagataacgttaagagagccattgatctc  
439 tctatagataacgtcaggaaftccatgaagctcaactaacggagacgttgaagttgagacttgcctggtgtagtctgctct  
440 cgttttcaagacctattgagaaaagttggcctctatattcctgggtggaaccgcaattctgccttccacttccctgatctgggtg  
441 ttctgccaaaagttgctggttgcagaagaaattgttttgcactcaccactaagaaggatggtacccttaccacagaagtcatcta  
442 cgttggccacaaggttgggtgctaagtgtatcgtgtagcaggaggcggccaggcagtagctgctatggcttacggaacag  
443 aaactgttccctaaaggtgacaaaatlttgggtccaggaaccagttcgttactgctgccaagatgatggttcaaatgacacat  
444 cagccctgtgtagtattgacatgcttgcctgctgggcttctgaagttctagtattgtctgataaatacgtgatccagatttctgtcc  
445 tcagaccttctgctcaagctgaacatggattgattcccaggtgattctgttggctgctgatatacagacaaggagcttgc  
446 agaattgaagatgctgttcacaaccaagctgtgacgttccaaggggtgaaattgtacgcaaggtattgcactctacaac  
447 cctatcgggtgcaacctacgagcaggcttggaaatgtccaatcagtagctctgaacacttgccttgcctgcaaatcgagaatg  
448 cttctctatgtgatcaagtacaacacgctggatctgtgttgggtgcttactctccagagagttgtggagattactcctccg  
449 gtaccaaccacacttggcaacgtacggatagcccgtcaatacagcggagttaacactgcaacctccagaagttcatcac  
450 ttcacaagacgtaactcctgaggactgaaacatattggccaagcagtgatggatctggctgctgttgaaggtctagatgct  
451 caccgcaatgctgttaaggttctgtatggagaaactgggacttattaaagtcgaccgatgcccttgcagagccttcaaccagtc  
452 agctcctccgggtgggcgccccgcatgactatcgtcggcgcacttatgactgtcttcttcatgcaactcgtaggacaggt  
453 gccggcagcgtcttccgcttctcgtcactgactcgtcgcctcggctgctcggctgcccgcagcgggtatcagctcactc  
454 aaaggcggtaatacggttatccacagaatcaggggataacgcaggaaagaacatgtgagcaaaaaggccagcaaaaaggc  
455 caggaaccgtaaaaaggccgcttctggtgcttccataggctcggccccctgacgagcatcaaaaaatcgacgctc  
456 aagtcagaggtggcgaacccgacaggactataaagataaccaggcgttccccctggaagctcctcgtcgcctcctctgt  
457 tccgacctgcccgttaccggatacctgtccgcttctccttccgggaagcgtggcgcttctcatagctcacgctgttaggta  
458 tctcagttcgggtgaggtcgtcctcaagctgggctgtgtgcacgaacccccgttcagcccagccgctgcgcttattcc  
459 ggtaactatcgtctttagtccaacccggtaagacacgacttatcgcactggcagcagccactggtaacaggattagcaga  
460 gcgaggtatgtagcgggtgctacagagttctgaagttggtggcctaactacggctacactagaagaacagattttggtatct  
461 gcgctctgctgaagccagttacctcggaaaaagagttggtagctcttgatccggcaaaacaaccaccgctggtagcgggtg  
462 gttttttgttgaagcagcagattacgcgcagaaaaaagatctcaagaagatccttcttctacggggtctgacgc  
463 tcagtgaacgaaaactcacgttaagggttttggctatgagattatcaaaaagatcttccactagatcctttaaattaaaaa  
464 tgaagtttaaatcaatctaaagtatatatgagtaaacttggctgacag

465 **The sequence of synthetic enhancers**

466 The optimized high activity developmental enhancers:

467 Generation:79\_individual:1:

468 TGATGTGACTCACATAGGCGGTGGCGTGATATGTTGTGACTCATTTCCTGG  
469 AAACGGATGACTAATGCCATATGTTATCAGTTTCCTGGAAATTTGATCACG  
470 CCATATTGTGAAATCATGCGATTCCCGGATCACGTGACGGCCGGACGTGA  
471 CAAGTATGAGTCACTAAGTGGCGTGATCTTACGAATCACGTGATGGTCAA  
472 TGTCACGTGATCGGCTGGTGAGTCAGCAATATCGTGTGATTCATTC

473 Generation:79\_individual:2:

474 TGATGTGACTCACATAGGCGGTGGCGTGATATGTTGTGAGTCACTTCCCG  
475 GAAACGGATGACTAATGCCATATGTTATCAGTTTCCTGGAAATTGAATCA  
476 CGCCATATTGTGAAATCATGCGATTCCCGGATCACGTGACGGCCGGACGT  
477 GATGACTAATCAGCAAAAAGTGGCGTGATCTCCGGAATCACGTGATGGTC  
478 CATGTCACGTGATCGGCTGGTGAGTCAGCAATATCGTGTGATTCATTC

479 Generation:90\_individual:1:

480 GCGTGATTATATCCGGTTTGTGGCGTGACTACAACCGGATGCATATCCGGT  
481 CATCCGGTTATGTCACGCCACTGTCACGCCATTCCAGGAAATCATCCGATC  
482 GATCACGCCACCGGATGATGGCGTGATCGAACATCCGATCACGCCATCCG  
483 GAAATCGTACGATGTGGCGTGATCGCGTGATCTGGCGTGATTATTCCAGG  
484 AATTGCGAATGAGTCATCACGCGACGTCATGACTCATAGGTGATAAG

485 Generation:90\_individual:2:

486 CATCGCGTGATCGCGATCGGATGACTCGGCTGAGTCACCGGATGTGACTC  
487 AGCTCTGGTTCTATGATTCATGCAGGAAATGACTCATTGAGTCATTCTTGG  
488 AAGTGGCGTGACTGTCTGGTGGCGTGACTTCCTGGAATGTGACTCAGCGG  
489 AAGTCATGACTCATTTCCTGGAAATCGTACGATGCGAGTCACGTAGGCCT  
490 ACGTGACGGTGAATCATACTACGTGGCGTGATACGGAGGAAATGACTC

491 The optimized high activity housekeeping enhancers:

492 Generation:20\_individual:1:

493 ACCGGCACACTAGAGCGACTAAGTCTGGGTGGCAACAGTCCGATACTTAC  
494 AGCGTATGAGTGGCTGCGATGCGGCTAGAGATGGGCCGCGTTTTCCACTC  
495 GATAGCATTCTAAGGCTTCCATCTCTAGGGCCGAAATCACGACACGGCAG  
496 CTTGACGAGTCAGATGAGTCCGCGTATCGATATTCTCACCTCTATTAGGAA  
497 AGCCATATGTGCTATCGATATGTTTATTAATCGCGGGCTTTTAGGGCT

498 Generation:35\_individual:554:

499 CTCGCACGAGTTTGACACA ACTCTATTCGTCCACCACTAGCCGCCACATC  
500 TCCGAGGCACGTCTATCGATAGCATCACTGACGCACTATCGATAGCCAC  
501 CGTAGTGGTTATCGAATATGCGGCTATCGAGACGTGAACTATCGATATGTT  
502 CGAGATCTACCGCTAGCGTCCGATCGATATTCTGATTGTGATGGACGCAT  
503 CTGGTATCGATACAACTATCGATAGGAAGAAAGACTGAACCGGTT

504 Generation:60\_individual:677:

505 CTGGTAGAGAGCGAGCAGTTATCGATAGGTCCACCACTAGCCGCCACAT  
506 CTCCGAGGCACGTCTATCGATAGTGTACTATCGATAACTATCGATTGCTCC  
507 GCCTATCGATAGACGTTGCCATCTCTAGCGGACGTGAACTATCGATACGT

508 ATCGATAGTTAGACGCGGACGACTATCGATTAGTTGACGTATCGATAGTA  
509 TGCGCCTATCGATAGTGCCTATCGATAGGCAGAACGCGTATCGATAAT  
510 Generation:79\_individual:1426:  
511 ACTTAGAGACATCGATAGTTATCGATACGTCCACCACTAGCCCATCTATCG  
512 ATAGACTAACGTCTATCGATATATCGCCCGACGCACTATCGATAGGCTCC  
513 GCCTATCGTCCGCGCGACTATCGATATGTATGCCCATCCCTAATGCGCGTA  
514 TCGATAGTTATCGATACACGACTATCGATAGCTAGAACTATCGATAGTAT  
515 GCGCCTATCGATAGTGCCTATCGATAGGCGGAACGCGTATCGATAAC  
516 Generation:95\_individual:99983:  
517 ACTTCGTACTATCGATAGTTATCGATTGGCCCACCACTAGCCGCCCTATCG  
518 ATAGCGGCACGTCTATCGATATATCGCCCGACGCACTATCGATAGTATCC  
519 GCCCATCGATAGTATCGCCCATCTCTATGCGTCCCATCCCTAATGCCACTA  
520 TCGATAGTTAGACGCGCACACGACTATCGATAGTTAGAACTATCGATAGTAT  
521 CCGCCTATCGATAGCGACTATCGATAGCCTATCGATAGGTTCGATAAC  
522 Generation:99\_individual:99988:  
523 AGAACGTACCATCGATAGTTATCGATAGGTCCACCACTAGCCGCGACTAT  
524 CGATTGTCCATGCCTATCGATATATCGCCCGACGCACTATCGATAGTATCC  
525 GCCTATCGATAGAATCGCCCATCTCTATGCGTCCCATCCCTAATGCGCCTA  
526 TCGATAGTTATCGATACGCGACTATCGATAGTTAGAACTATCGATAGTATG  
527 CGCCTATCGATAGCGACTATCGATAGCCTATCGATAGGTTCGATAGC  
528 The optimized high activity housekeeping silencers:  
529 Generation:60\_individual:133:  
530 CTGTCCGAGATACGGCTGGTGGTAAGCACGAGCCCAGCCGGATGCGCGGG  
531 ACCGTCGCCC GGCTAGAAAGACCAGGTAAGTAACGCCCATGAAGGGCCG  
532 CGGCAGGTAAGTTAGGACAGGTAAGTGCAAGGACAGGTAAGTCCTACCT  
533 GCAGAGACTCCTTATCAAGGAGATAAACGTACTTACCTTACCAGGTA  
534 TCCGGTTCGAGTACTTACCTACTTACCTATGTTCCATATCCGAGGCCATGG  
535 Generation:79\_individual:72:  
536 GGTGATCTGAGAGCCCACAGGTAAGTTGAGCTCACAGGTAAGTAGCCCGC  
537 AGGTAAGTCTGGGCTGTGCTCACTTACCTACGTATAACGCAGTCCCAAGCA  
538 GGTAAGTACAGGTAAGGTAAGTAGGTAAGTAAGTACTTACCTACCTACTT  
539 ACCTTGATATCGTATACTTACCTACCTACGCACACTTGGCTTGACTTACCT  
540 ACTTACCTATTTCCGGTCCGCGTTGGGGCCCCGGCAGGTAAGTTAGTAA  
541 Generation:79\_individual:613:  
542 CCCGGATGCCTGCGGCTGGTGGTAAGCACGAGCCCAGCCGGAAGCTCAGA  
543 GGAAGTAGTTGCAGCCCCAGGTCAGGTAAGTAACCGCTGCCAACCCGCAG  
544 GGCAGGTAAGTTAGGACAGGTAAGTGACGACAGGTAAGACAGGTAAG  
545 TAGAGACTCCTTATCTTATCCTTATCTTACTTACCTTACCAGTACTTCCG  
546 TCTTATCGTACTTACCTACTTACCTATCTTTCATATCCGGCCATAGCC  
547 Generation:99\_individual:99994:  
548 CGAAGCATATCTGCCACAGGTAAGTTGAGCTCACAGGTAAGTTGCCTGC  
549 AGGTAAGTATGTCCTGCGCTCACTTACCTACGTATAACGCAGAGGTAAGTA  
550 GGTAAGTTCAGGTAAGGTAAGTAGGTAAGTAAGTACTTACCTAGATACTT

551 ACCTTGGCGATGGCATACTTACCTACCTATCTCAGGGCTTACCTACTTACCT  
552 ACTTACCTATTTCCGGCTCTGTGGTAAGTCTTGCGTATACTTACCAAC  
553 Generation:99\_individual:99956:  
554 CCCGCCGAGATACGGCTGGTGGTAAGCACTCGCCCGGACGGAAGCTCCCC  
555 AGTGGGACACGCAGCCCAAGGACAGGTAAGTACTTCCTGTTCGGTAGGCAG  
556 GTAAGGTAAGTAAGGACAGGTAAGTGCACGGACAGGTAAGTCAGGTAAG  
557 TAGATAGTCCTTATCTTATCCTTATCTGTACTTACCTTACCAGGTAAGTCCG  
558 TCTTATCGTACTTACCTACTTACCTATCTTTCATATCCGGCCATAACC  
559 The optimized high activity developmental enhancers with 3 fixed RESs (AgeI =  
560 "ACCGGT", Sall = "GTCGAC", HindIII = "AAGCTT", marked in bold font):  
561 Generation:80\_individual:1:  
562 AACTGACTCACTCGTCACGCCACTTCCTGTTCGTGGATGACTCATTCCAGA  
563 **CCGGTGGCGTGATGATTCATTTCCGGTGACTCATTTCGGGGATGGCGTGA**  
564 **CCGGAAGTGACTCACAGATCACGTGATGGCGTGATCGGATGATCATCCGG**  
565 **TCGACATCCGGTGACTCACTTCCGGTTCGGAAGTGGCGTGATCACGCCACA**  
566 **AGCTTCCGGGTCTTAGTCATGCTGCTGAGTCATTTCCCTGTTGAAAACC**  
567 Generation:90\_individual:1:  
568 TGAAATGATCACGTGATCACGTGATCGCGTGATCTTGCCTGAGTCATCCA  
569 **ACCGGTGAATCACTGGATGACTAATATGGCGTGATCGGAAATGACTCAG**  
570 **ACCGGAAATCACGTGATGTGAGTCACAGATGGCGTGATCGGATCACGTGA**  
571 **TGTCGACCGGATGTGACTCACTGGATGACTCAACATGGCGTGATCATGAC**  
572 **TAAGCTTCCGGTGACTCAGCATGGCGTGATCACGTGATTGTGATTATTG**  
573 The optimized high activity housekeeping enhancers with 3 fixed RESs (AgeI =  
574 "ACCGGT", Sall = "GTCGAC", HindIII = "AAGCTT", marked in bold font):  
575 Generation:80\_individual:1:  
576 TACGCTGATTTTTTTTTTTTCGTTTCCGGTTATCCAAATAATTGGACGTGAC  
577 **CGGTGGCGTGATGGCGTGGTTGACGTGTTATCGATTTATCGATATCGATA**  
578 **AATATCGATGGCGTGATGACGTGTCGTTGATGACTAACGTCACGTAGTGT**  
579 **CGACGTGATTGACTCATTCCGATCACGTGATGTTTCTAAAGCGAAAGGAA**  
580 **GCTTGAAAGGGGGTGGGGAGGGGGTGGTGAGGCAAAGGGATCACGAA**  
581 Generation:90\_individual:1:  
582 ATGTGACCCGACTATCGATTACTGAACCGCGCCTATCGCTTATCGACTGAA  
583 **CCGGTGGCTGTTAGACGTGACTATCGATACTTAGCCTATCGATAGTTTGAG**  
584 **ACTATCGATACACGAACCTATCGATAGTCAGCGCCGCGGACTATCGATAG**  
585 **TCGACA ACTATCGATACGCACA ACTATCGATACGCGAACTATCGATAGTA**  
586 **AGCTTCCGCGTGACTATCGATAGCACGCTATCGATAGTCGCGACTGTC**  
587 The optimized AT-rich high activity developmental enhancers:  
588 Generation:80\_individual:1(GC:0.11):  
589 TAATTTTATATATAAATTTTTTATGAATATTTAAATTTATAATAATTTATTA  
590 TTTTATATTTTTAAATGATTCATAATAATAAAAATAATCACATGATTT  
591 TAATTTATGAATCATATCACGTGATGGCGTGATCGTATGATCATGATTAAT  
592 AATAAAATTATGAATCATAAAATGACTAATAACAAAATTCTTAGAAATTTA  
593 TAAATTAATAAAATATAATTATTTATAAATTTTTTATATATTA  
594 Generation:90\_individual:1(GC:0.13):

595 AAAATTTATATAATATTTTTATATATATATAATTTTATATATAAATACATAT  
596 ATAATTATGATTCATTTTATAAGTATGAATCATAGTCATATGACTATTATA  
597 TGATTCATTTTTTGGATGATTCCTTCTGGAATGAATCATTTTTAATGATTC  
598 ATATAATGATTCATAAAAAATTATGAATGATGAAATTCTTAGAATGAATC  
599 ATTATAAATAATAAATTTAATAATTATGATGAAATATAATAAAT

600 The optimized AT-rich high activity housekeeping enhancers:

601 Generation:80\_individual:1(GC:0.09):

602 AATTAATTTAATTATTTTTTTTTTTTTTATTATTTTTTTTTTATTTTTTATGAT  
603 GAAATATAAAAAAAAAAATATATATCGATTAATTATCGATATAATAATTA  
604 TCGATATATTTAGTATTAGTCATCATATGACTCATATATTTAAATTAGTC  
605 ATTAATATGATTCAAAAAAAAATGACTCATATAATATTAATTTTTTTTTTAT  
606 ATTTAATTTTTTTTATTATTAAAAAAAAAAATTAATAAATTTAA

607 Generation:90\_individual:1(GC:0.08):

608 ATTATAATAATTTTTATAAATTATTTTTTTTTTATATTAATAAATATATTT  
609 AAAATAATATTTAATTTTATAATTAATTTTTAAAAAAAAATTTAAATAAATT  
610 ATCGATATATTTAGTATTTTATCGATATTATAAAAATACTAAAAAAAAATATC  
611 GATATTTTAGATTAATCGATATATCGATACATAAAAATATCGATATATCGA  
612 TTATTATAACTATCGATATATTATTTTAAATAATTTTTATTAT

### 613 **The sequence of CMV enhancer**

614 CGTTACATAACTTACGGTAAATGGCCCGCCTGGCTGACCGCCCAACGACC  
615 CCCGCCATTGACGTCAATAATGACGTATGTTCCCATAGTAACGCCAATA  
616 GGGACTTTCCATTGACGTCAATGGGTGGAGTATTTACGGTAAACTGCCCA  
617 CTTGGCAGTACATCAAGTGTATCATATGCCAAGTACGCCCCCTATTGACGT  
618 CAATGACGGTAAATGGCCCGCCTGGCATTATGCCCAGTACATGACCTTAT  
619 GGGACTTTCCTACTTGGCAGTACATCTACGTATTAGTCATCGCTATTACCA  
620 TG

### 621 **The sequence of Hr5 enhancer**

622 CGCGTAAAACACAATCAAGTATGAGTCATAAGCTGATGTCATGTTTTGCA  
623 CACGGCTCATAACCGAACTGGCTTTACGAGTAGAATTCTACTTGTAACGC  
624 ACGATCAGTGGATGATGTCATTTGTTTTTCAAATCGAGATGATGTCATGTT  
625 TTGCACACGGCTCATAAACTCGCTTTACGAGTAGAATTCTACGTGTAACGC  
626 ACGATCGATTGATGAGTCATTTGTTTTGCAATATGATATCATAAATATGA  
627 CTCATTTGTTTTTCAAACCGAACTTGATTTACGGGTAGAATTCTACTTGT  
628 AAAGCACAATCAAAAAGATGATGTCATTTGTTTTTCAAACCTGAACTCGC  
629 TTTACGAGTAGAATTCTACGTGTAACACAATCAAGAAATGATGTCATT  
630 TGTTATAAAAATAAAAGCTGATGTCATGTTTTGCACATGGCTCATAACTAA  
631 ACTCGCTTTACGGGTAGAATTCTACGCG

### 632 **The sequence of UASE enhancer**

633 AATAGAGGAACCGTTTACCTGTGGTTCCTATTGTGGCCTACTGTTACTAGC  
634 TAGTGTAATACACCCTTGCCCTCAGCTTTGCAAGTTGACAACTCAGCCAA



## 635 **Vector and DNA construction for luciferase transgenic *Drosophila*** 636 **lines**

637 The pVA-Enhancer-DSCP-Luciferase-SV40 vector is constructed based on the pVA-  
638 luciferase vector which is given from the Pro. Ni (Tsinghua University). Briefly, pVA-  
639 luciferase was cut with KpnI and SpeI and ligated with an amplified fragment of SV40  
640 from pNP (gift from Pro. Ni in Tsinghua University, fwd: 5'-  
641 GGGGTACCGGATCTTTGTGAAGGAACCTTACTTCTGTGGTGTGAC-3', rev:  
642 5'- GCACTAGTTGGAACCAGACATGATAAGATAACATTGATGAGTTTGGAC-  
643 3'). The resulting vector was cut with XbaI and BamHI and ligated with an amplified  
644 fragment from the following steps: Amplify the optimal enhancer sequence (fwd: 5'-  
645 CATCGCGTGATCGCGATCGG-3', rev:5'- GAGTCATTTCCCTCCGTATCAC-3')  
646 and DSCP promoter sequence (fwd:5'-  
647 GATACGGAGGAAATGACTCGTCGACGAGCTCGCCC-3', rev:5'-  
648 CGGGATCCTTTGGTATGCGTCTTGTGATTCAAAGTTG-3') from the  
649 corresponding vector then use the overlap PCR process to amplify the enhancer-DSCP  
650 fragment. Then the pVA-Enhancer-DSCP-Luciferase-SV40 was constructed. The  
651 pVA-Enhancer-DSCP-Luciferase-SV40-Enhancer were constructed in the same way.

## 652 **Transgenic *Drosophila* construction**

653 The construction of luciferase transgenic flies is based on the previous protocol (20)  
654 with some modifications. Briefly, the pVA-Enhancer-DSCP-luciferase-SV40, and  
655 pVA-Enhancer-DSCP-luciferase-SV40-Enhancer were injected into the TB16 and  
656 TB18 to get the transgenic *Drosophila*.

## 657 **Luciferase assay *in vivo***

658 Luciferase activity was measured using the Steady-Glo Luciferase Assay Kit (Promega).  
659 A single adult fly (2-day-old) was collected and well-grinded in 100 $\mu$ L GLO lysis  
660 buffer for different genotype samples, each luciferase assay contained three  
661 independent samples. Samples were homogenized and centrifuged at 12,000xg for  
662 5min, 30  $\mu$ L supernatant was taken into the 96-well plates. Then add the 30  $\mu$ L luciferin  
663 into the supernatant and well-mix. After incubation in the dark for 5min, luminescence  
664 was measured on a luminometer (Thermo Scientific, VAR-IOUSKAN FLASH).

## 665 **Recombinase-based enhancer integration in human genome and** 666 **enhancer activity measurement**

667 The designed enhancers and the CMV enhancer were cloned into plasmids containing  
668 attB sites and a green fluorescent protein (GFP) marker. Each plasmid containing a  
669 designed enhancer was co-transfected at a 1:1 ratio with a plasmid expressing serine  
670 integrase into 293T landing pad cells, which possess attP integration sites (cell lines  
671 were sourced from our laboratory). Empty vectors were included as controls. After 10  
672 days of culture, non-integrated plasmids were degraded, and GFP-expressing cells  
673 indicating successful integration were sorted using flow cytometry. Monoclonal cells  
674 obtained from the sorting process were seeded into 96-well plates and cultured in  
675 medium supplemented with 20% fetal bovine serum. Positive clones were expanded  
676 and imaged using a fluorescence microscope, and their average fluorescence intensity  
677 was quantified with ImageJ software (<https://imagej.net/ij/>).

## 678 **Training DREAM with human multi-cell line STARR-seq data**

679 We collected STARR-seq data from the A549 (Accession: ENCSR895FD, 70,011  
680 peaks), HCT116 (Accession: ENCSR064KUD, 43,718 peaks), and MCF7 (Accession:  
681 ENCSR547SBZ, 79,466 peaks) cell lines, all obtained from the ENCODE project  
682 (<https://www.encodeproject.org/>). These datasets share a common input DNA library  
683 (Accession: ENCSR547SBZ), effectively minimizing batch effects. The human  
684 genome was segmented using a step size of 300 bp and a window size of 400 bp. To  
685 broaden the activity spectrum of enhancers within the dataset, we randomly selected  
686 420,000 non-peak regions (background regions) where input DNA read counts  
687 exceeded 20. Consequently, the dataset was comprised of peak regions from A549,  
688 HCT116, and MCF7 cell lines, along with randomly selected background regions. We  
689 used regions from chromosomes 21 and 22 as the validation set (7,995 regions) and test  
690 set (11,339 regions), respectively. Enhancer activity was quantified as the log<sub>2</sub> fold  
691 change of RNA read counts mapped to genomic regions relative to the input DNA read  
692 counts. Except for modifying the output dimension of SENet's final layer to three, all

693 other hyperparameters were kept consistent. We retrained SENet on these datasets and  
694 evaluated its performance using the hold-out test dataset from chromosome 22.

695

696 **Supplementary Figures**

697 **Supplementary Figure 1. The structure of the SENet**

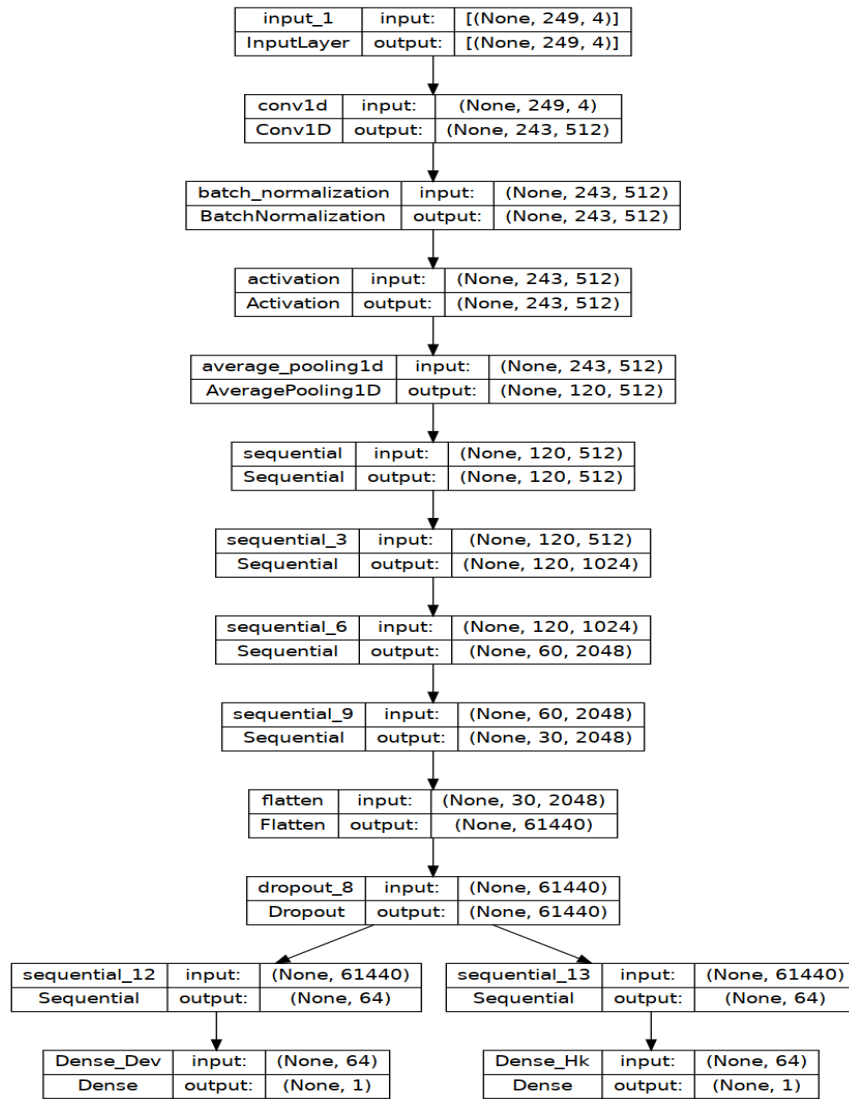

698

699

700 The structure of the SENet.

701

702 Supplementary Figure 2. Performance evaluation of SENet's predictions in test set  
703 excluding repeats.

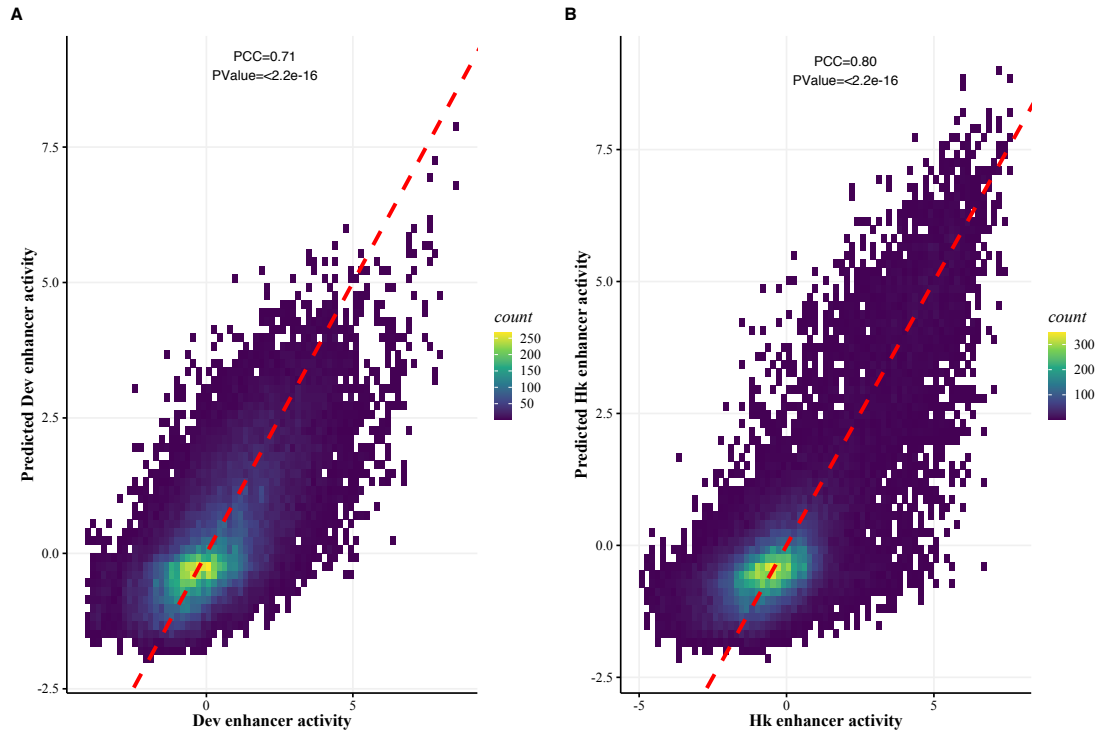

704  
705  
706  
707  
708  
709

Scatter plots of SENet predicted vs. observed developmental (A) and housekeeping (B) enhancer activity signal across 32,036 DNA sequences in the test set chromosome not overlapping with repeats. The PCC is denoted for each comparison.

710 Supplementary Figure 3. Performance evaluation of SENet's predictions of chromatin  
711 accessible regions in test chromosome (23,506 DNA accessible regions).

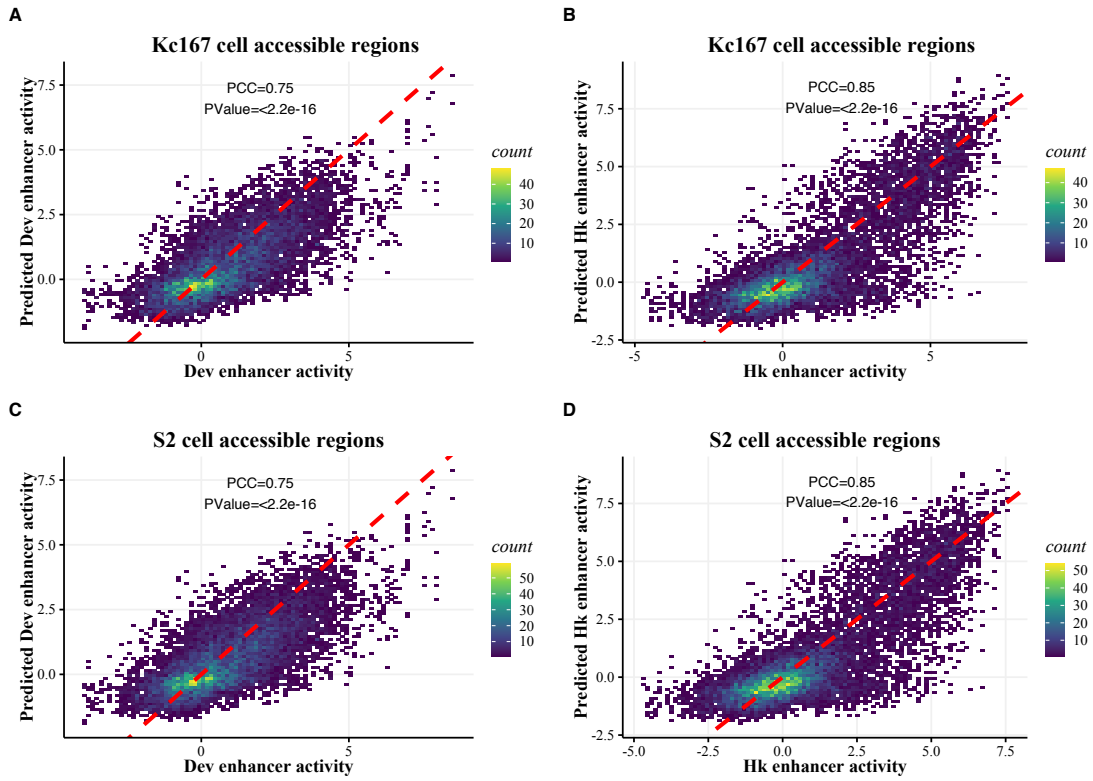

712 Scatter plots of SENet predicted vs. observed developmental (A, C) and housekeeping  
713 (B, D) enhancer activity signal across DNA sequences in the test set chromosome  
714 overlapping with accessible region of Kc167 cell (A, B; 10746 DNA sequences) and  
715 S2 cell (C, D; 12760 DNA sequences). The PCC is denoted for each comparison.  
716  
717

718 Supplementary Figure 4. Performance evaluation of SENet's predictions of synthetic  
719 enhancers in *Drosophila* S2 cells

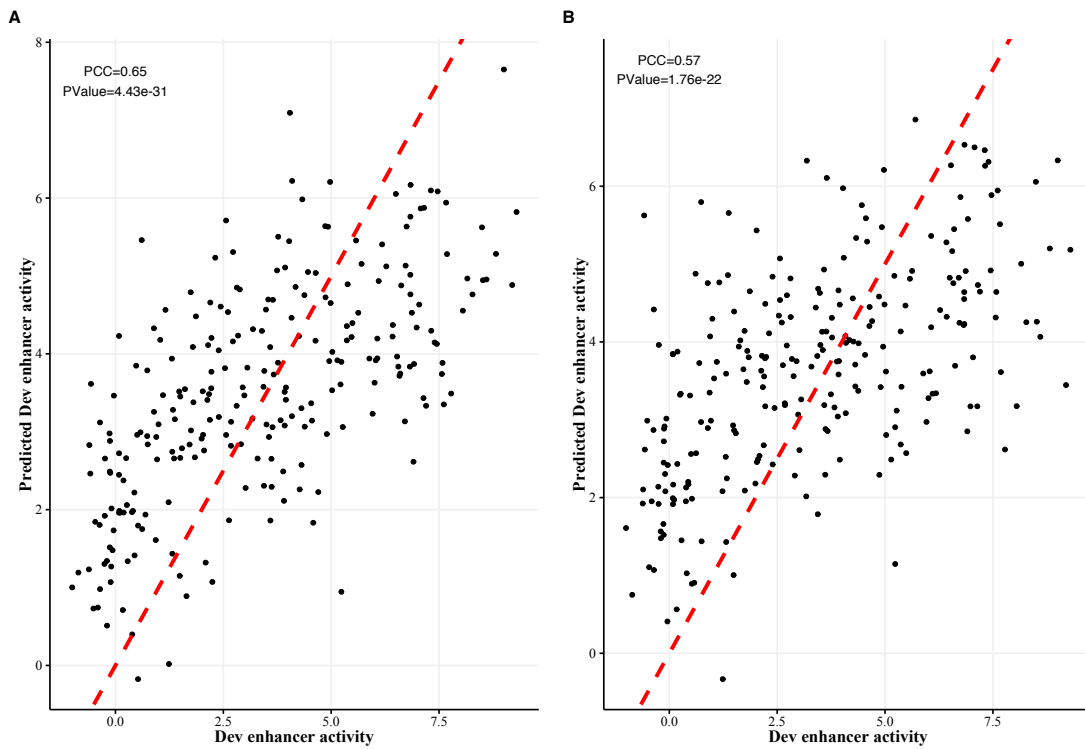

720

721 (A) Scatter plot of SENet predicted vs. experimentally measured activity of synthetic  
722 enhancers in *Drosophila* S2 cells. (B) The Scatter plot of DeepSTARR predicted vs.  
723 the same experimentally measured activity of synthetic enhancers in *Drosophila* S2  
724 cells. The synthetic enhancers activity data sourced from the de Almeida *et al.* (1) The  
725 PCC is denoted for each comparison.

726

727 Supplementary Figure 5. Dataset distribution and model performance evaluation using  
 728 10-fold cross validation

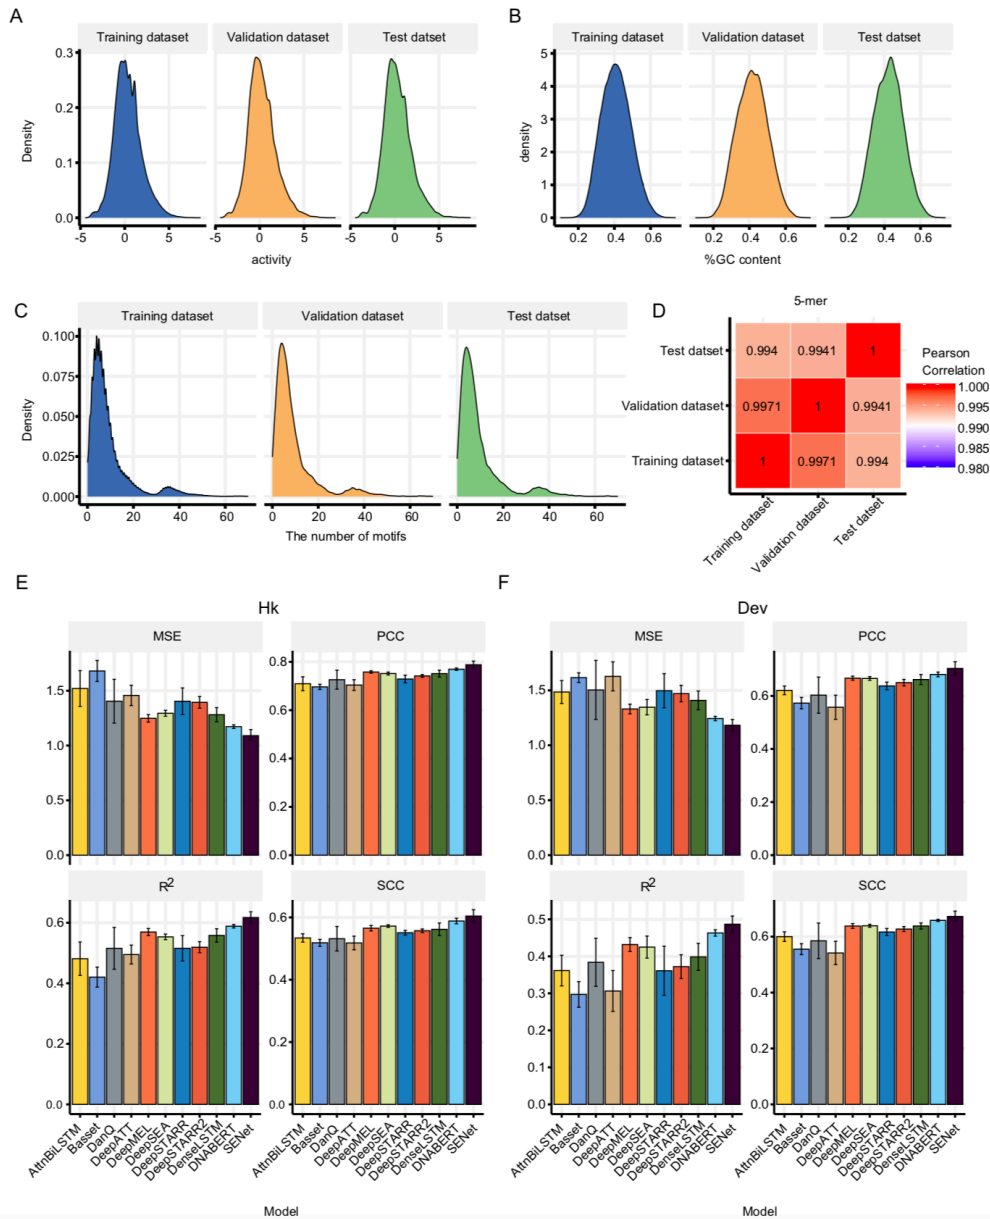

729  
 730 (A), (B), and (C) display the distributions of sequence activity, GC content, and the  
 731 number of transcription factor (TF) motifs per sequence in the training, validation, and  
 732 test datasets, respectively. Panel (D) illustrates the 5-mer frequency similarities among  
 733 sequences across these datasets. (E) and (F) present the 10-fold cross-validation results  
 734 for 11 models, including SENet, on an independent test dataset, with performance  
 735 metrics represented as bar graphs for Mean Squared Error (MSE), Pearson Correlation  
 736 Coefficient (PCC), Coefficient of Determination ( $R^2$ ), and Spearman Correlation  
 737 Coefficient (SCC).



738 Supplementary Figure 6. Some functional motifs are capture by different filters  
 739 recurrently, which implies that the filters are highly redundant

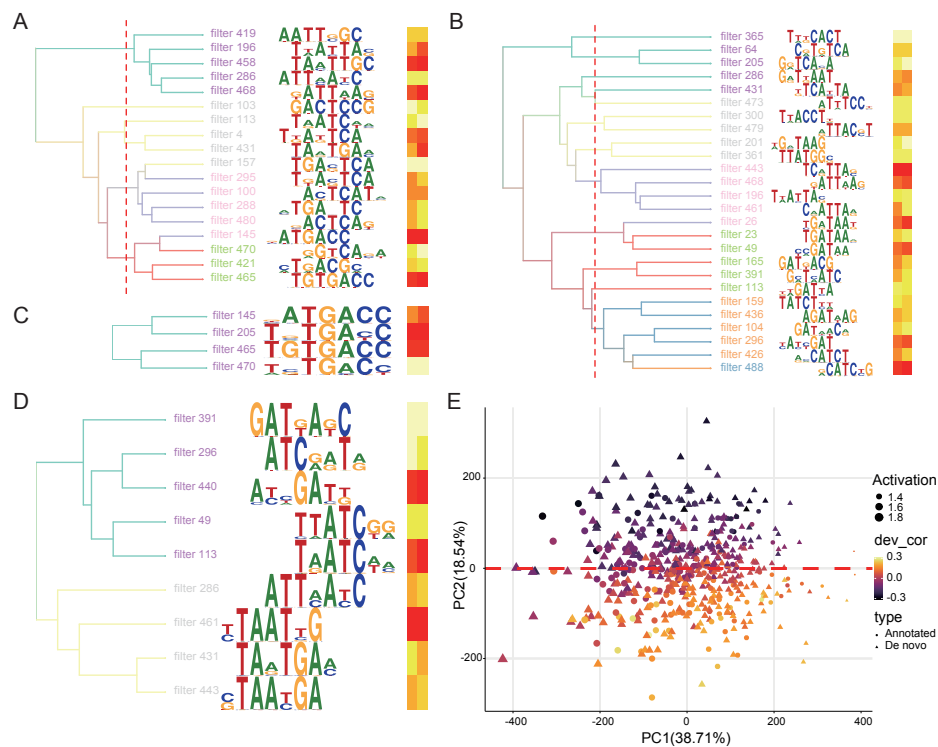

740  
 741 The filters in the first convolutional layer of SENet can recover the key (A), GATAd  
 742 (B), Ohler1 (C), and DRE (D) motifs associated to enhancer activity. The heatmap  
 743 indicates the influence on the predictions of developmental and housekeeping enhancer  
 744 activity, respectively. (E) Discovered DNA motifs associated with enhancer activity.  
 745 Clustering of 512 motifs discovered by DREAM framework. Shown are the first two  
 746 principal components of the motif occurrence frequencies in sequence windows  
 747 (activity). Triangles represent the *de novo* motifs and dots denote motifs with significant  
 748 (FDR <0.05) similarity to annotated motifs in the databases. Marker size indicates the  
 749 average activity; the estimated motif effect on housekeeping enhancer activity is shown  
 750 by colour.  
 751

752 Supplementary Figure 7. Annotated motifs present higher information content and  
753 activation of the convolutional layer in SENet.

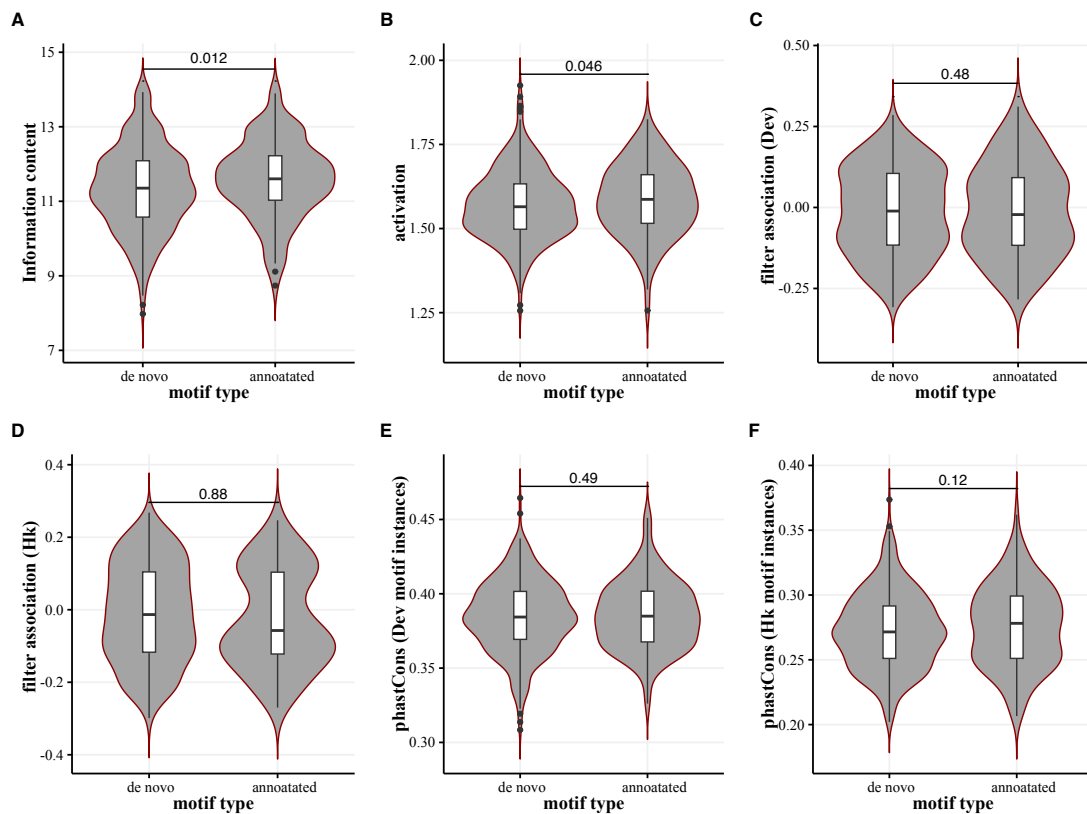

754  
755  
756  
757  
758  
759  
760  
761  
762  
763

Six attributes of the *de novo* motifs and annotated motifs learned by SENet are presented, including (A) information content, (B) activation of filters in the initial convolutional layer of SENet, association with developmental enhancers (C), and housekeeping enhancers (D). Additionally, the PhastCons scores within motif instances of developmental enhancers (E) and housekeeping enhancers (F) are displayed (one-sided Wilcoxon rank-sum test).

764 Supplementary Figure 8. SENet learned motifs can predict enhancer activity, matching  
 765 or surpassing known TF motifs.

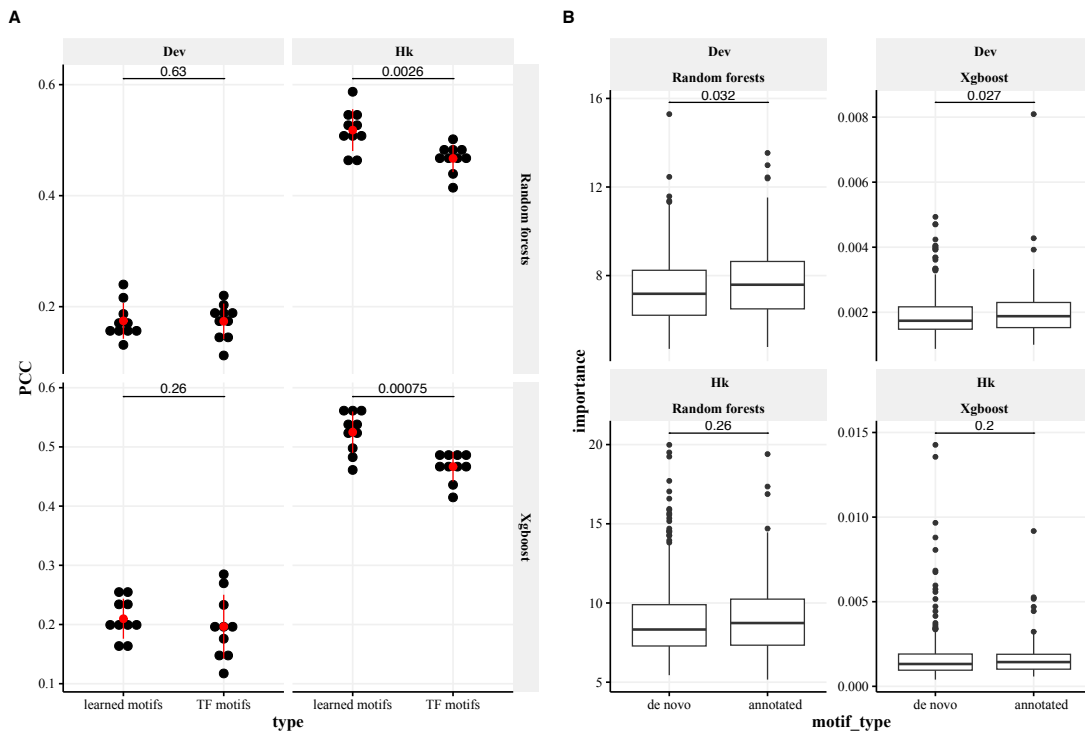

766  
 767 (A) Random forests and XGBoost models were constructed using SENet-learned motifs  
 768 and known TF motifs from the JASPAR database as features to predict the activity of  
 769 development and housekeeping enhancers, respectively. The ten-fold cross-validation  
 770 results are presented in the figure, showcasing that SENet-learned motifs exhibit the  
 771 capability to predict enhancer activity, either matching or surpassing the predictive  
 772 power of known TF motifs. The red dots represent the mean PCC. (B) The feature  
 773 importance for the annotated motifs (can match with the JASPAR database) and *de*  
 774 *novo* motif (one-sided Wilcoxon rank-sum test).  
 775

776 Supplementary Figure 9. Two complementary metrics, the activation and the influence  
 777 of filters reflect the evolutionary constraints of the matched DNA sequences and  
 778 recovered TFs, respectively.

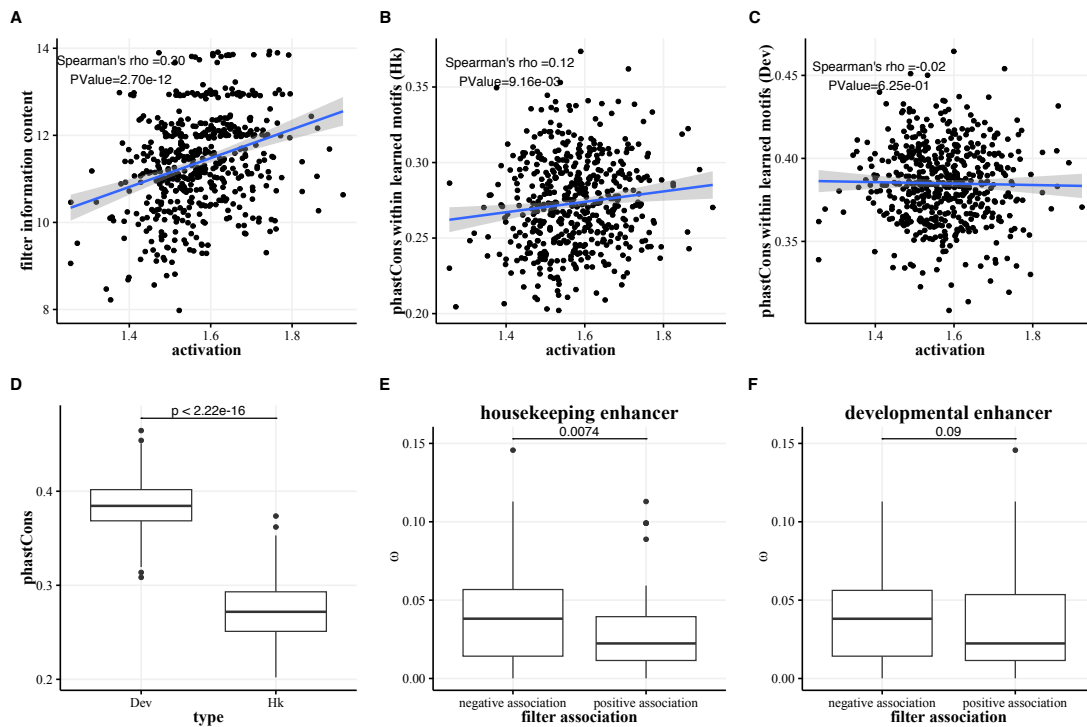

779  
 780 (A) Filters exhibiting higher activation in the first convolutional layer of SENet  
 781 correspond to motifs with elevated information content. (B) Depicts the motif instances  
 782 (matching the filters) exhibiting increased activation within housekeeping enhancers,  
 783 which show greater evolutionary conservation (15-way PhastCons score, obtained from  
 784 <https://hgdownload.cse.ucsc.edu/goldenPath/dm3/phastCons15way/>). However, no  
 785 statistically significant correlation was detected in developmental enhancers (C). (D)  
 786 Developmental enhancers exhibit greater evolutionary conservation compared to  
 787 housekeeping enhancers (one-sided Wilcoxon rank-sum test). (E) and (F) Illustrate  
 788 filters with higher influence on activity prediction capturing TFs with lower  
 789 evolutionary rates (one-sided Wilcoxon rank-sum test). The blue line represents linear  
 790 regression between x and y variables for the corresponding figures, with the grey region  
 791 indicating the 95% confidence interval. The PAML 4.9 (2) was used to calculate  
 792 evolutionary rates (dN/dS<sub>i</sub>) of captured TFs based on their orthologous genes from the  
 793 same six *Drosophila* species used to calculate dN/dS previously (3).

794 Supplementary Figure 10. Correlation of DNA sequence motifs

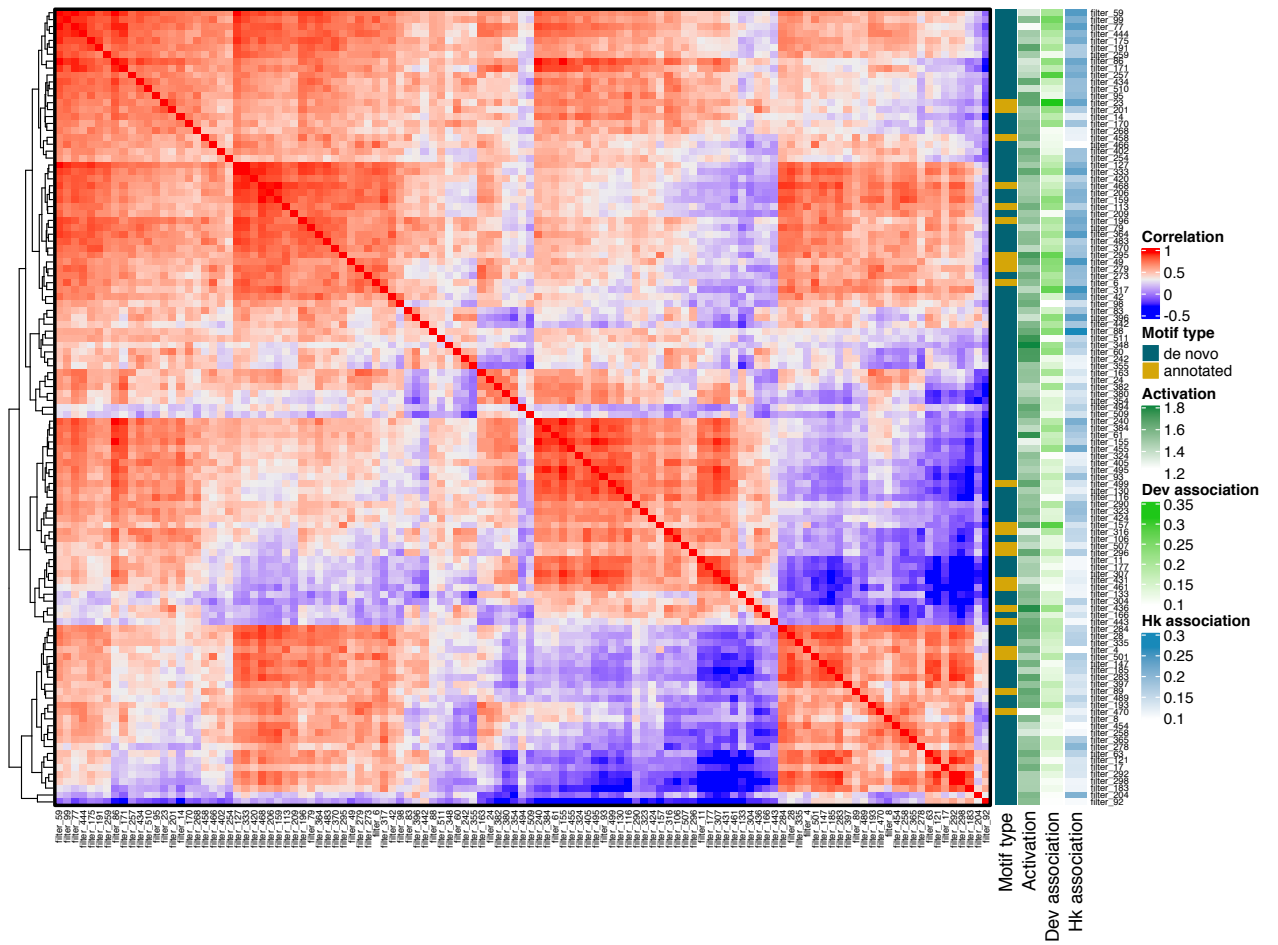

795  
796 Pairwise Pearson correlation coefficients between motif activities, showing clusters of  
797 motifs with large association with enhancer activities (association > 0.1).  
798  
799

800 Supplementary Figure 11. The comparison of the DNA features learned by SENet and  
 801 DeepSTARR.

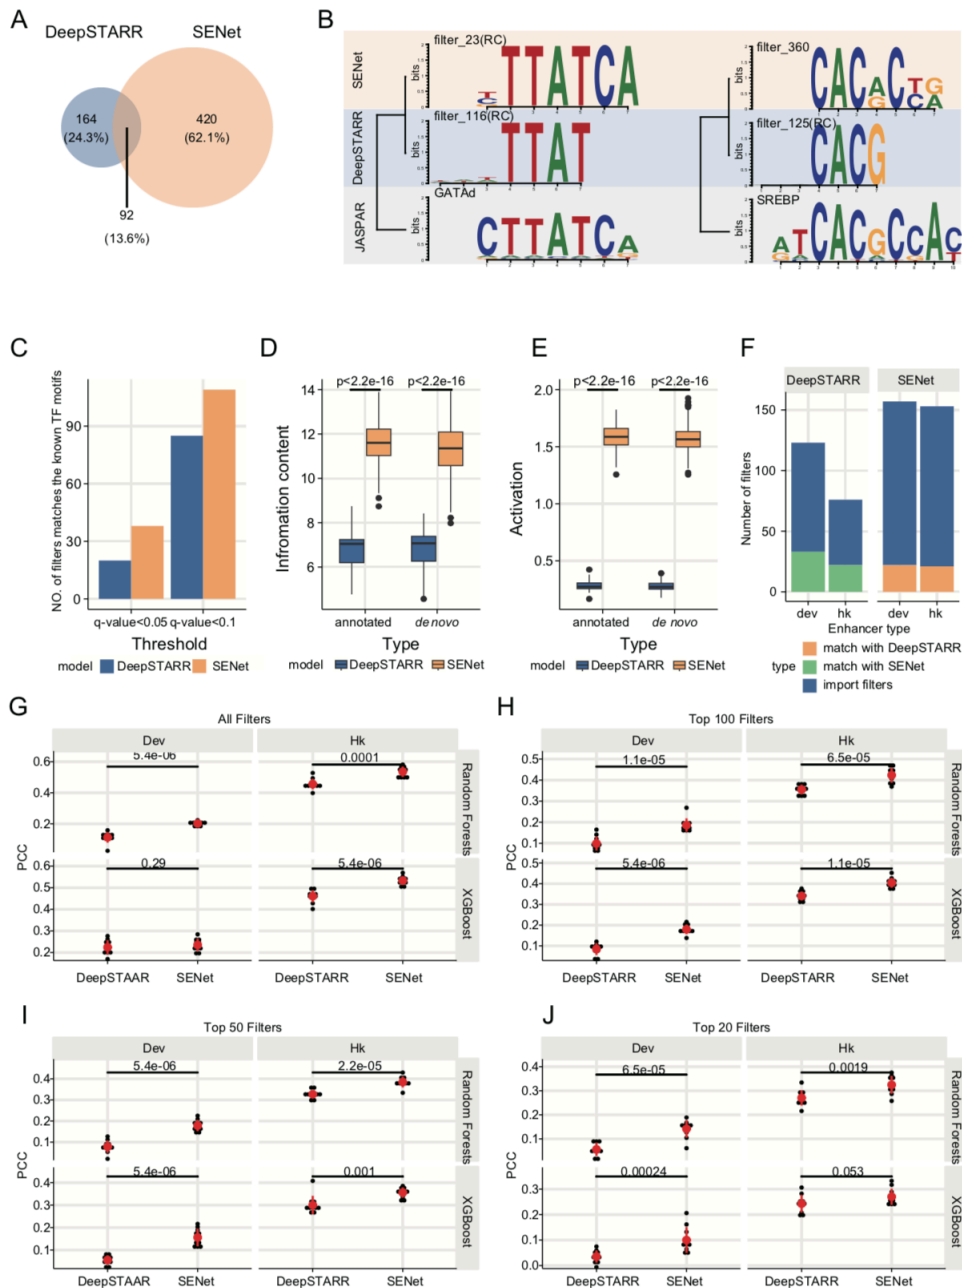

802  
 803 (A) Venn diagram showing the number of shared DNA motifs captured by the first  
 804 convolution layer filters of SENet and DeepSTARR ( $q\text{-value} < 0.1$ ). (B) The first  
 805 convolution layer filters of SENet and DeepSTARR capturing the DNA motifs of  
 806 GATAd and SREBP. (C) The number of unknown TF motifs captured by filters in  
 807 SENet and DeepSTARR under different thresholds. (D) and (E) The information  
 808 content and activation value of filters in SENet and DeepSTARR, respectively. (F) The  
 809 number of filters with importance greater than 0.1 for predicting developmental and  
 810 housekeeping enhancers in SENet and DeepSTARR. (G-J) Random forest and  
 811 XGBoost models constructed using the DNA features captured by filters in SENet and

812 DeepSTARR for predicting the activity of developmental and housekeeping enhancers.  
813 “All filters”, “top 100 filters”, “top 50 filters”, and “top 20 filters” denote models  
814 constructed using all filters and the top 100, top 50, and top 20 filters ranked by  
815 importance, respectively.  
816

817 Supplementary Figure 12. *In silico* analysis reveals positional effects of key motifs in  
 818 housekeeping enhancers, distance-dependent TF motif epistasis, and contributions of  
 819 TF motif-related features to enhancer activity

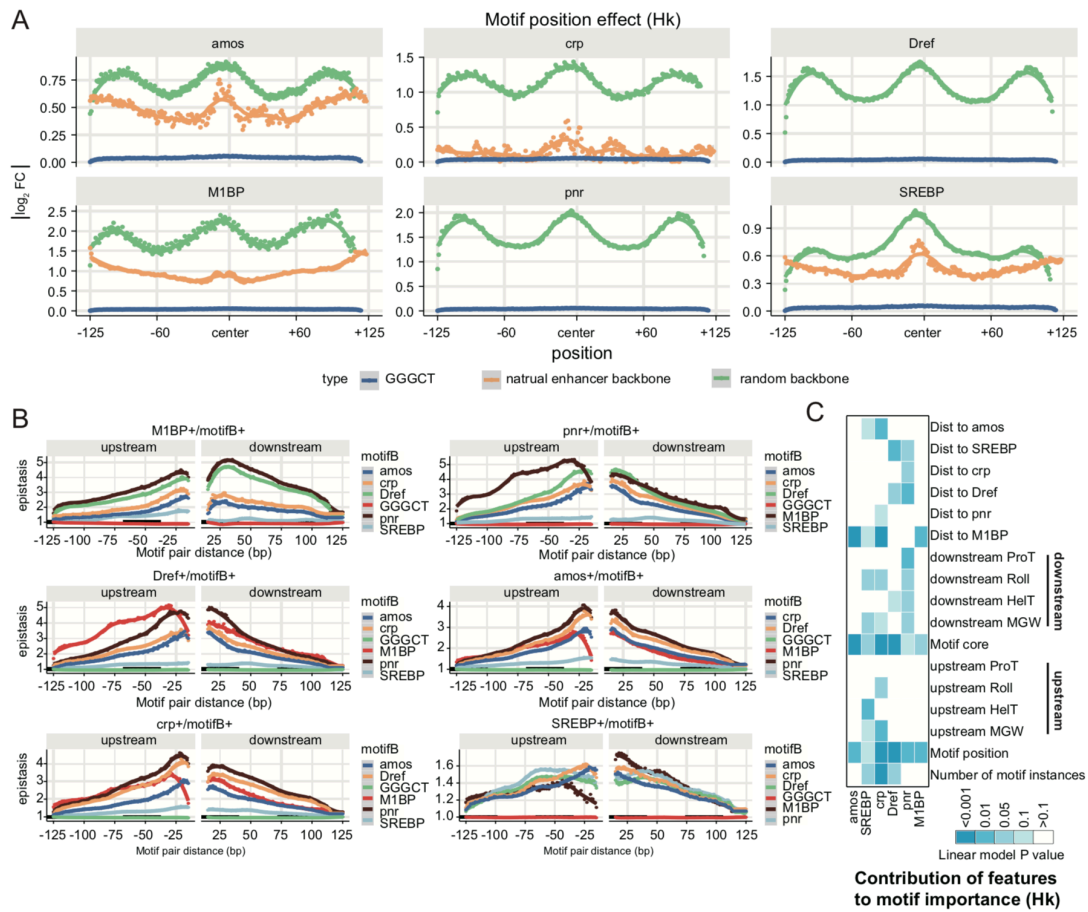

820  
 821 (A) Positional effects of the top six TF motifs in housekeeping enhancers. Green lines  
 822 represent the “Random Backbone Sequences” strategy, orange lines indicate the  
 823 “Natural Enhancers” strategy, and blue lines denote the negative control “GGGCT”.  
 824 Panels without orange lines indicate the absence of natural enhancers containing only  
 825 a single instance of the specific TF motif, thus preventing the use of the “Natural  
 826 Enhancers” strategy (see Methods). (B) Epistasis effects between TF motifs as a  
 827 function of the relative distance between motifs. The first motif in the title is fixed at  
 828 the center of the backbone, while the second motif (motif B) is computationally moved  
 829 (color-coded). The “GGGCT” motif serves as a negative control (see Methods). Dashed  
 830 line indicates an additive effect. (C) Contributions of TF motif-related features to  
 831 housekeeping enhancer activity. For each TF motif (each row), multiple linear  
 832 regression models were constructed using the number of motif instances, the distance  
 833 from the enhancer center, the binding strength of the TF (motif core, with  $-\log(\text{binding}$   
 834  $\text{probability})$  as a proxy), DNA shape scores of the flanking sequences, and the relative  
 835 distances between key motifs. The P-Value of each motif feature from these models  
 836 indicate the significance of each motif feature’s contribution to enhancer activity.  
 837



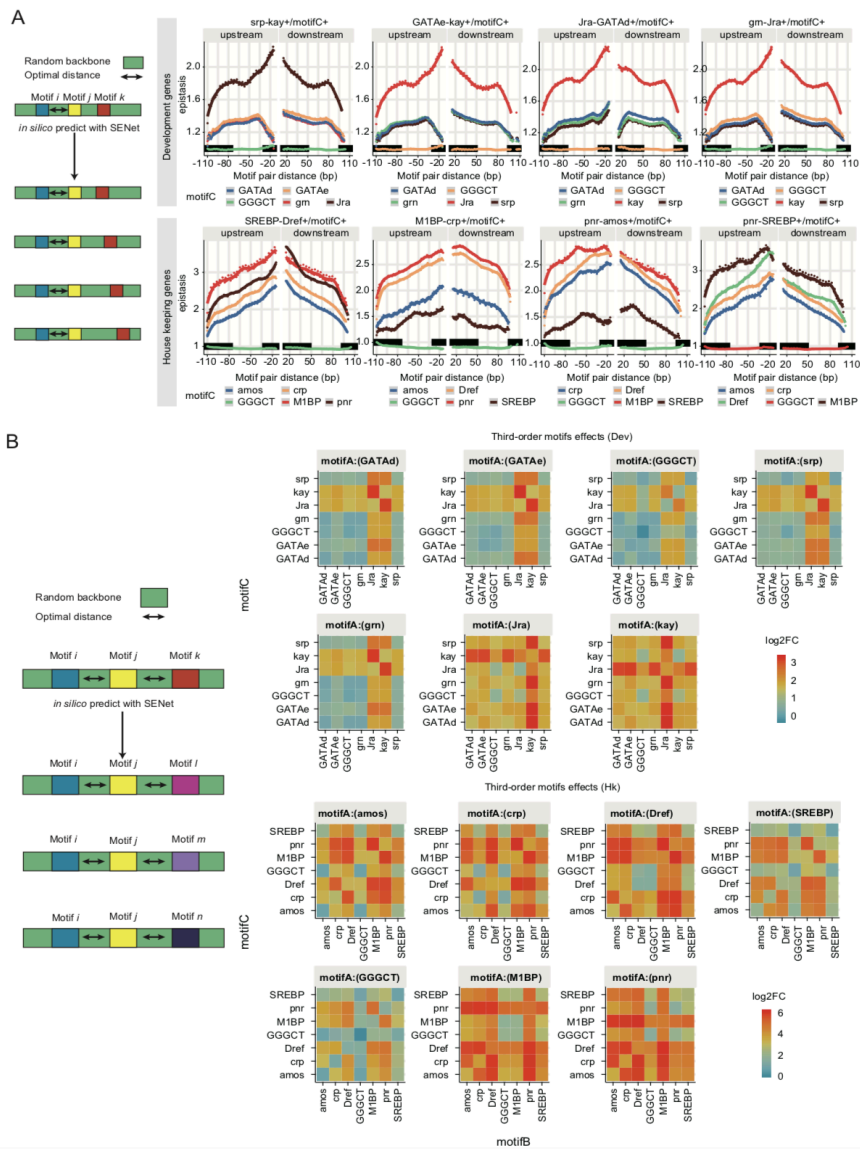

839  
 840 (A) Epistasis effects of three TF motifs as a function of the relative distance between  
 841 the third motif and the two fixed motifs at the backbone sequence center. Each panel  
 842 title indicates the fixed motifs (motifA-motifB) at the center of the backbone, while  
 843 motifC (shown in different colors) is computationally moved to calculate the epistasis  
 844 effect at distance  $d$  (see Methods). The “GGGCT” motif serves as a negative. The  
 845 dashed line indicates an additive effect. (B) Combination effects of three TF motifs in  
 846 developmental and housekeeping enhancers. MotifA, motifB, and motifC are fixed at  
 847 the center of the backbone, maintaining optimal relative distances. The combination  
 848 effect is defined as the fold change in predicted enhancer activity with motifs embedded  
 849 compared to the backbone’s enhancer activity (see Methods).  
 850

851 Supplementary Figure 14. Impact of initial population size on DREAM-optimized  
 852 enhancer activity

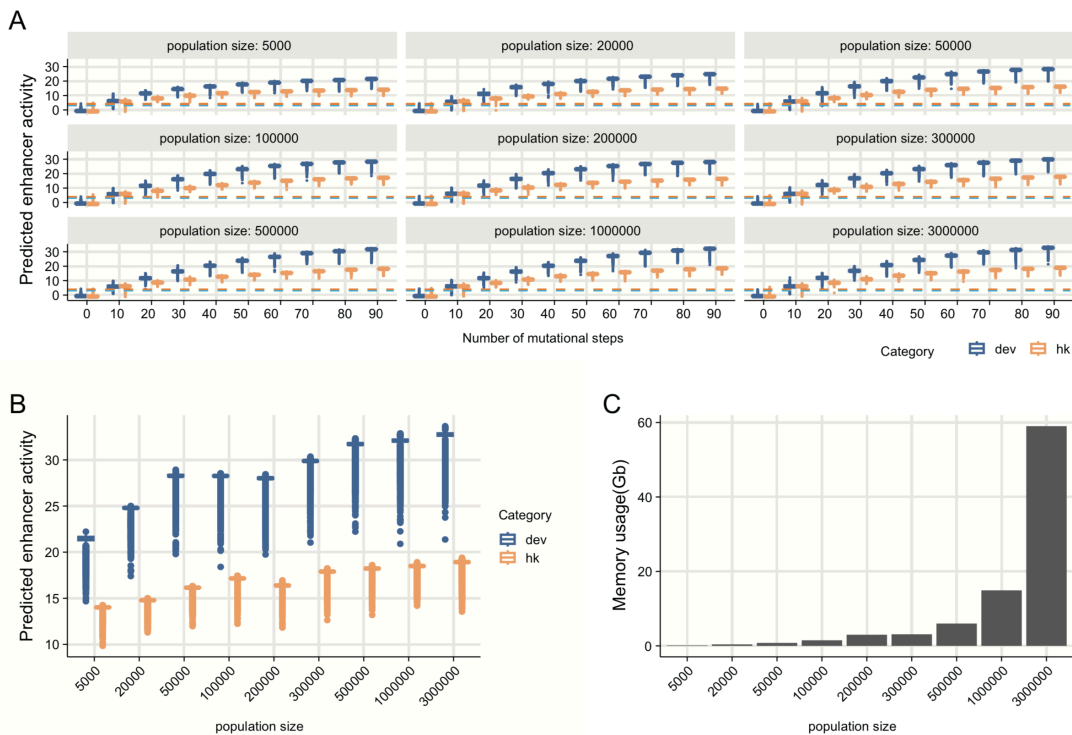

853  
 854 (A) Distribution of predicted enhancer activity (y-axis) for developmental and  
 855 housekeeping enhancers across mutation steps (x-axis) under varying initial population  
 856 sizes. The blue and yellow dashed lines represent the strongest activity measured in  
 857 *Drosophila* S2 cells for developmental and housekeeping enhancers, respectively. (B)  
 858 Final optimized enhancer activity distribution under different initial population sizes.  
 859 (C) Computational memory requirements for DREAM at different initial population  
 860 sizes. Boxes indicate the 25th, 50th, and 75th percentile values, with whiskers  
 861 extending to the most extreme data points within 1.5 times the interquartile range from  
 862 the edges of the boxes.  
 863

864 Supplementary Figure 15. Dynamic changes in sequence properties of designed  
 865 enhancers during the *in silico* optimization trajectory

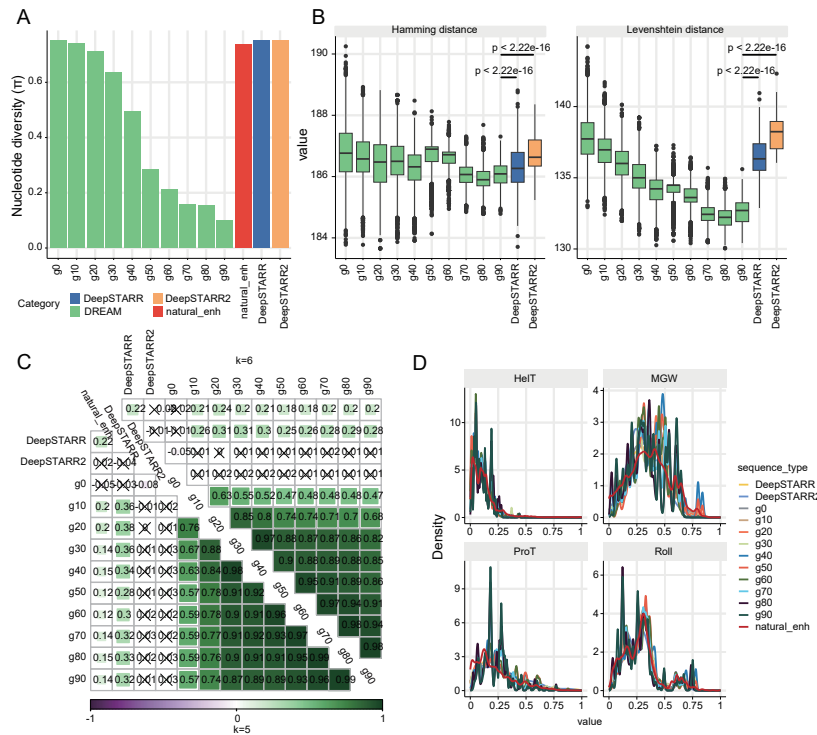

866  
 867 (A) The dynamic changes in nucleotide diversity( $\pi$ ) within the population during the  
 868 sequence optimization process, with natural enhancers in the *Drosophila* genome, and  
 869 enhancers designed by DeepSTARR and DeepSTARR2 serving as references. The  
 870 letter “g” denotes “Generation”. (B) The dynamic changes in sequence distance to  
 871 natural enhancers during the sequence optimization process, measured using Hamming  
 872 distance and Levenshtein distance. The sequence similarities of designs by  
 873 DeepSTARR and DeepSTARR2 with natural enhancers are provided as references. (C)  
 874 Heatmaps illustrating the Pearson correlation coefficient (PCC) of 5-mer and 6-mer  
 875 frequencies between sequences designed by DREAM, DeepSTARR, and  
 876 DeepSTARR2, and natural enhancers. Pairs with a P-Value  $> 0.05$  are marked with an  
 877 “×”. (D) Distributions of the predicted scores for the four DNA shapes (minor groove  
 878 width (MGW), roll (Roll), propeller twist (ProT), and helix twist (HelT)) for the 10 bp  
 879 flanking regions of key TF motifs during the sequence optimization process by  
 880 DREAM. The Corresponding predicted scores in natural enhancers, DeepSTARR, and  
 881 DeepSTARR2 are provided as references.  
 882

883 Supplementary Figure 16. The dynamic co-occurrence pattern of known TFs captured  
 884 by the Top10 filters during the *in silico* optimization trajectory.

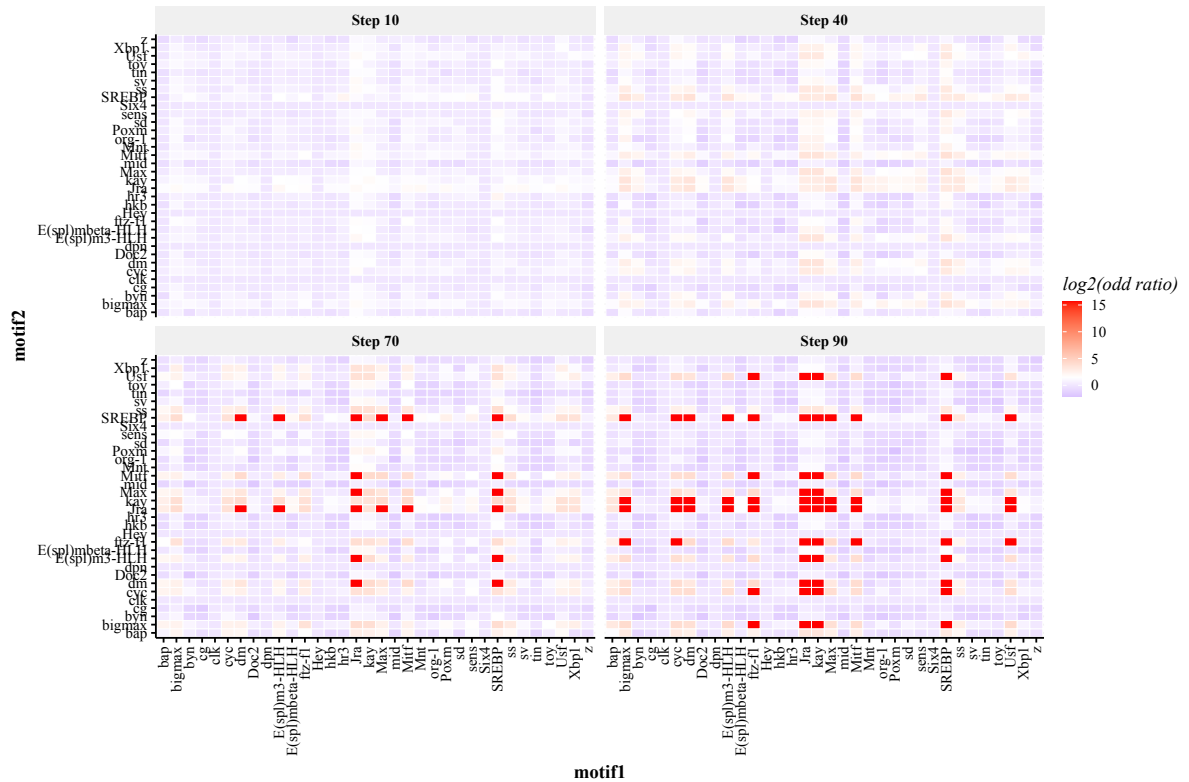

885  
 886 The heatmap depicts the dynamic enrichment of known motif pairs captured by the Top  
 887 10 filters throughout the *in silico* optimization trajectory. For simplicity, samples from  
 888 the sequence population were taken at the 10th, 40th, 70th, and 90th evolutionary steps.  
 889 The odds ratio was calculated using a one-sided Fisher's exact test, with the *in silico*  
 890 initial sequence population serving as the background.  
 891

892 Supplementary Figure 17. The dynamic co-occurrence pattern of known TFs enriched  
 893 the final optimized enhancers during the *in silico* optimization trajectory.

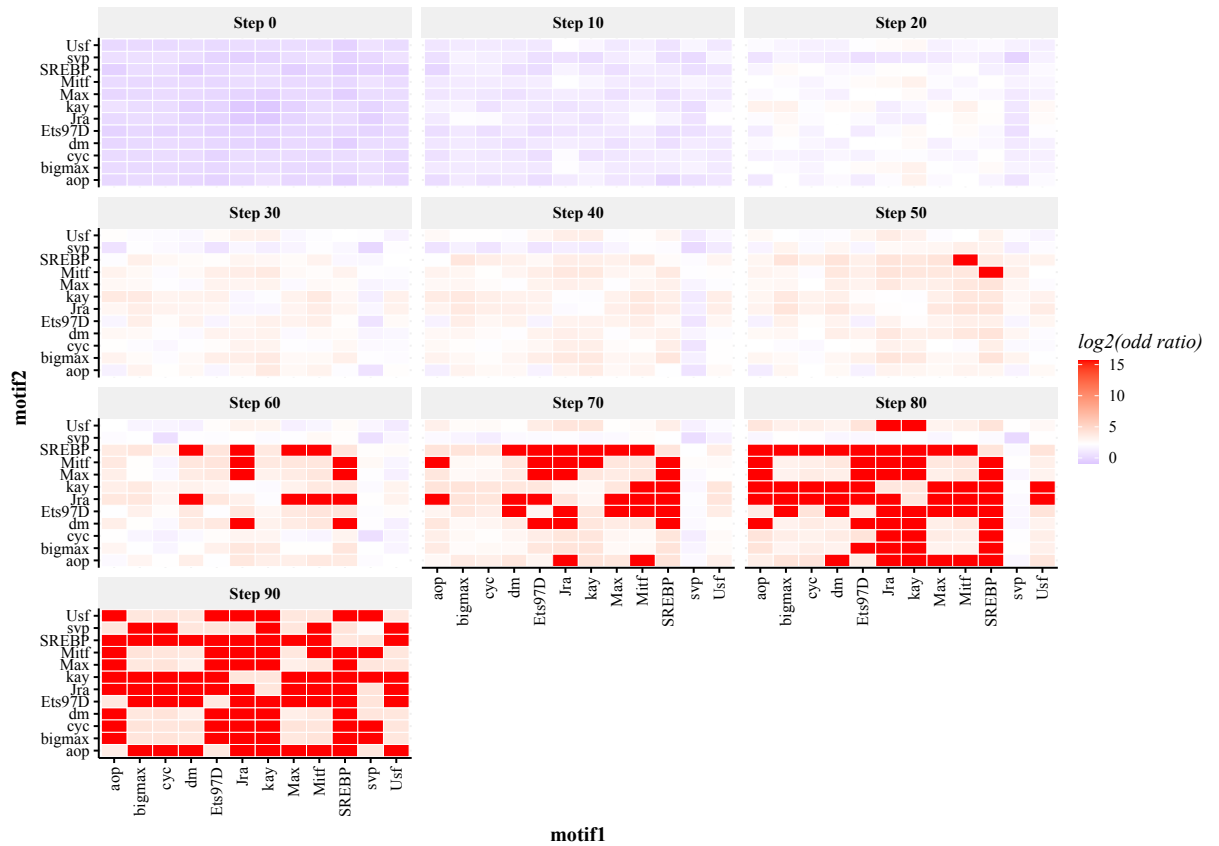

894  
 895 The heatmap illustrates the dynamic enrichment of known motif pairs in the final  
 896 optimized sequences during the *in silico* optimization trajectory. For simplicity, only  
 897 representative motifs with a Fisher's odds ratio greater than 4 are displayed. The odds  
 898 ratio was calculated using a one-sided Fisher's exact test, with natural enhancers in the  
 899 *Drosophila* genome as the background.  
 900

901 Supplementary Figure 18. By customizing the fitness function, the DREAM framework  
 902 can design silencers or simultaneously optimize the sequence properties of enhancers

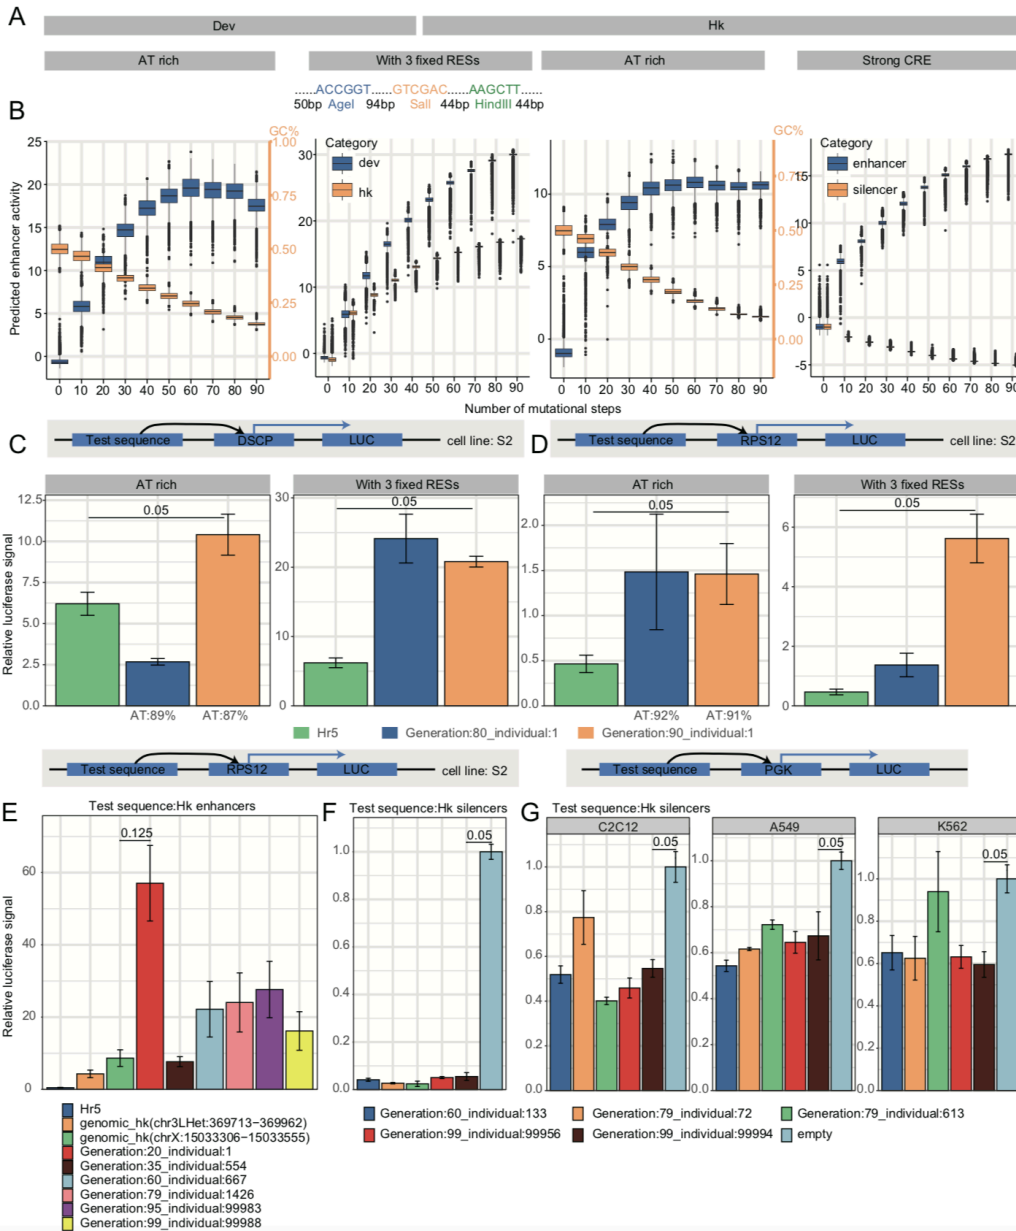

903  
 904 (A) Illustration of CREs design tasks: 1. “AT rich + strong activity” developmental and  
 905 housekeeping enhancers, 2. developmental and housekeeping enhancers with user-  
 906 specified restriction enzyme sites (“with 3 fixed RESs”), and 3. strong housekeeping  
 907 silencers and enhancers (see Methods for details). (B) Distribution of predicted activity  
 908 for developmental and housekeeping CREs during the *in silico* optimization process (y-  
 909 axis). The x-axis represents mutation steps. In the “AT rich + strong activity” panel, the  
 910 second y-axis indicates the GC content of sequences. Blue and orange boxes represent  
 911 enhancer activity and GC content, respectively. The DREAM framework was used to  
 912 simultaneously increase both the AT content and the activity of developmental and  
 913 housekeeping enhancers. In the “with 3 fixed RESs” panel, blue and orange boxes  
 914 represent developmental and housekeeping enhancers, respectively. In the “strong  
 915 housekeeping silencers/enhancers” panel, blue and orange boxes represent

916 housekeeping enhancers and housekeeping silencers, respectively. In all panels, boxes  
917 denote the 25th, 50th, and 75th percentile values, with whiskers indicating the  
918 outermost points within 1.5 times the interquartile range from the box edges. (C) and  
919 (D) Validation of synthetic CREs designed for the “AT rich + strong activity” and “with  
920 3 fixed RESs” tasks in *Drosophila* S2 cells using luciferase reporter assays, with the  
921 Hr5 enhancer as the control. (E) and (F) Validation of housekeeping enhancers (E) and  
922 housekeeping silencers (F) in *Drosophila* S2 cells using luciferase reporter assays. In  
923 validating synthetic housekeeping enhancers, the two strongest housekeeping  
924 enhancers (chr3LHet:369713-369962 and chrX:15033306-15033555) from the  
925 *Drosophila* genome and the Hr5 enhancer were used as controls. For synthetic  
926 housekeeping silencers, the empty vector was used as a control. (G) Validation of  
927 housekeeping silencers in C2C12 (mouse), A549 (human), and K562 (human) cell lines  
928 using luciferase reporter assays (using PGK promoter), with the empty vector as the  
929 control. All luciferase values are normalized to Renilla luciferase activity. Error bars  
930 represent the standard error of the mean (n = 3 biological replicates; one-sided  
931 Wilcoxon rank-sum test).  
932

933 Supplementary Figure 19. The TF motifs in optimized housekeeping silencers using  
 934 DREAM.

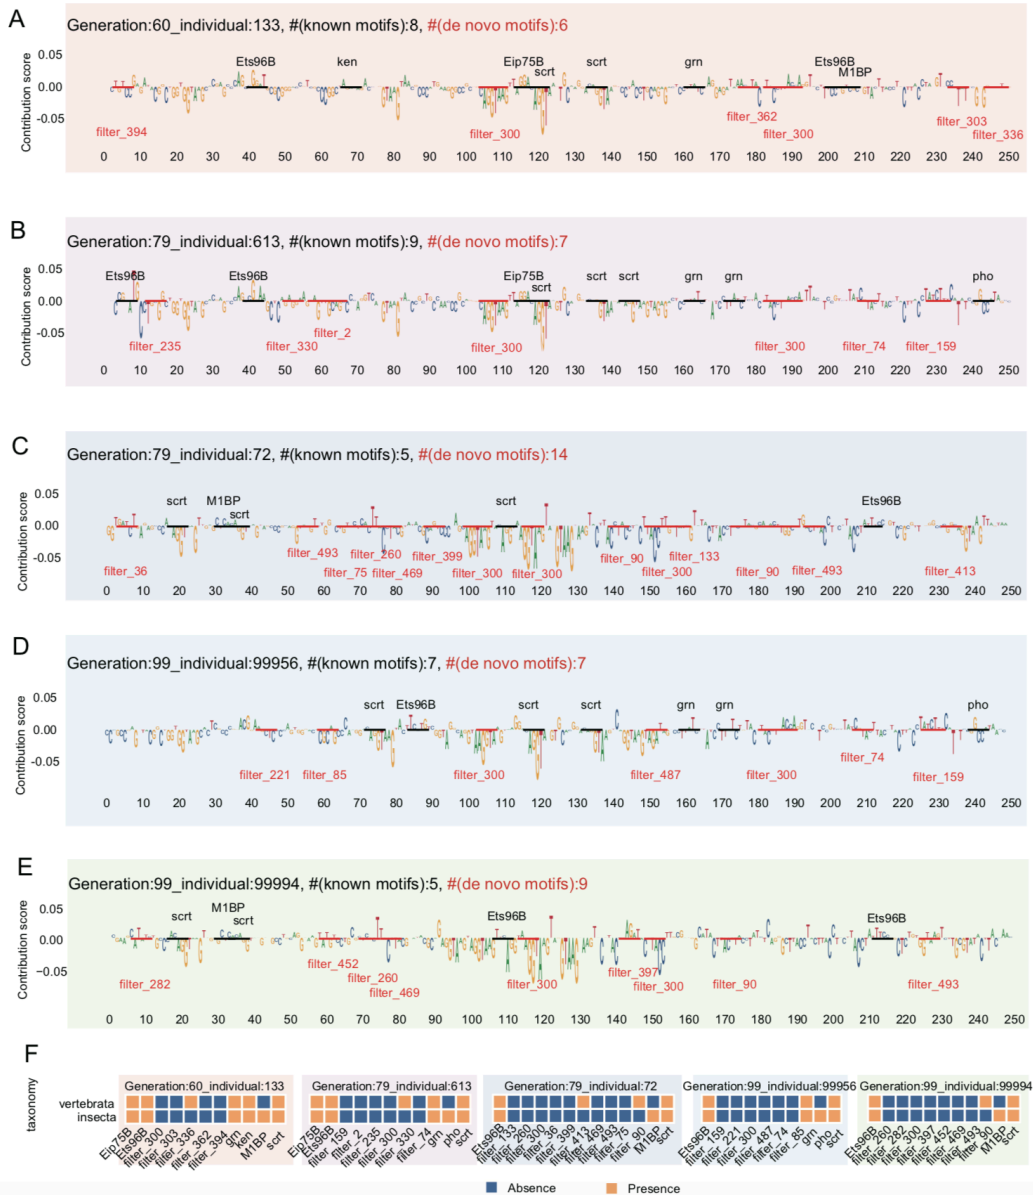

935  
 936 (A)-(E) Nucleotide contribution scores for the optimized housekeeping silencers  
 937 derived from the SENet using DeepExplainer. Instances of motifs identified by  
 938 DREAM are emphasized, with known motifs indicated in black and *de novo* motifs  
 939 marked in red. The number of known motifs (#(known motifs)) and the number of *de*  
 940 *nov* motifs (#(*de novo* motifs)) are also marked. (F) The colored matrices illustrate the  
 941 presence or absence of TF motifs (x-axis) in the corresponding taxonomy (y-axis), with  
 942 blue indicating absence and orange indicating presence of the TF in the respective  
 943 taxonomy.  
 944



945 Supplementary Figure 20. Designing medium strength enhancers with DREAM.

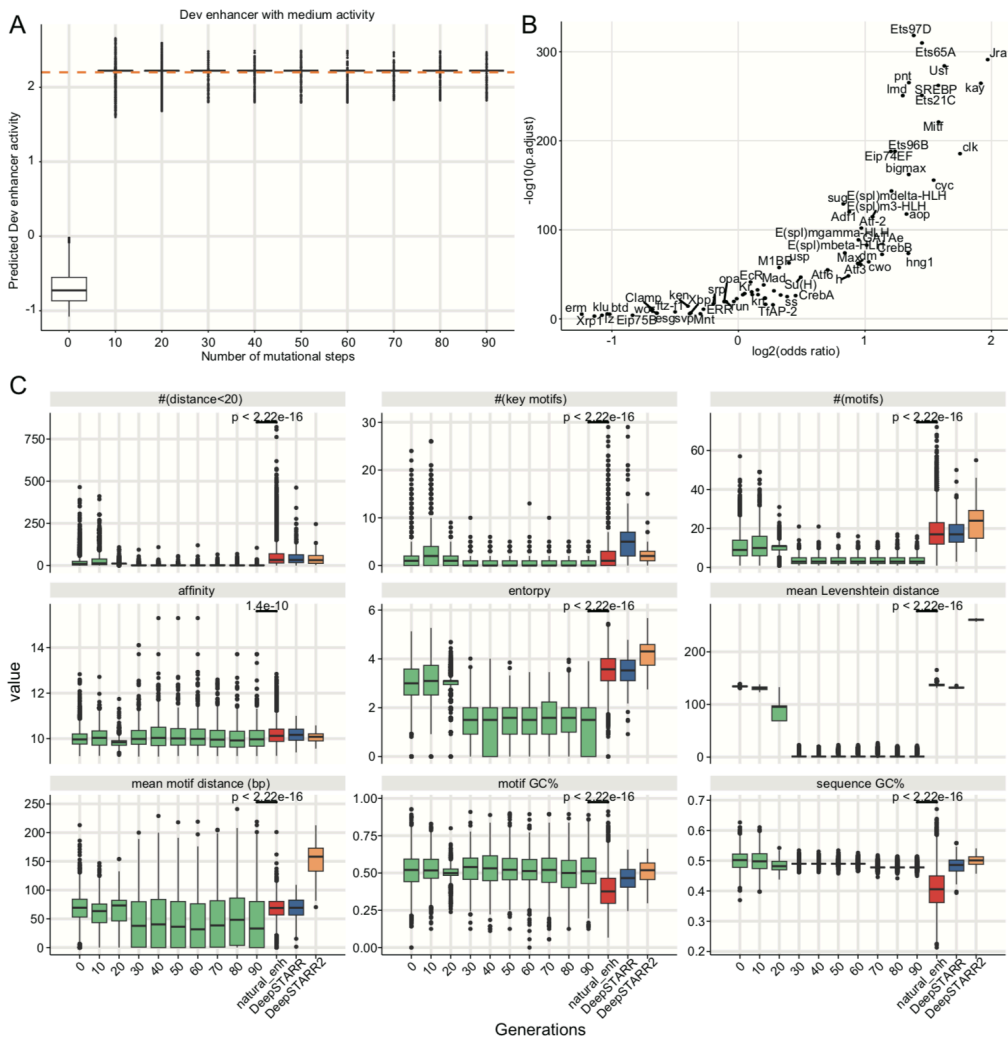

946  
 947 (A) Distribution of predicted enhancer activity (y-axis) for developmental enhancers at  
 948 various mutational steps (x-axis) during the *in silico* optimization trajectory favoring  
 949 medium activity. The boxes denote the 25th, 50th, and 75th percentile values, while the  
 950 whiskers extend to the furthest point within 1.5 times the interquartile range from the  
 951 boxes' edges. The yellow dashed line indicates the mean activity of Drosophila  
 952 developmental enhancers measured in S2 cells (2.19). (B) TF motifs over-represented  
 953 in designed enhancers with medium strength compared to genomic noncoding regions  
 954 of non-enhancers (background). The x-axis represents the  $\log_2$ -transformed one-sided  
 955 Fisher's exact test odds ratio, and the y-axis represents the corresponding FDR-  
 956 corrected significance. (C) This panel illustrates various characteristics, including the  
 957 count of TF motif pairs with distances less than 20 bp (#(distance<20)), the average  
 958 number of (key) TF motifs (#(motifs)), TF binding affinity quantified by  $-\log(\text{binding}$   
 959  $\text{probability})$ , diversity of TF motifs evaluated through entropy, sequence diversity  
 960 quantified by Levenshtein distance, the mean distance between TF motifs, and GC  
 961 content of binding TF motifs (motif GC%) and sequences (sequence GC%) throughout  
 962 the *in silico* optimization trajectory. The x-axis outlines the steps of the *in silico*  
 963 optimization process, and the results are compared with natural enhancers in the

964 *Drosophila* genome as well as synthetic enhancers designed by DeepSTARR and  
965 DeepSTARR2 (one-sided Wilcoxon rank-sum test).  
966

967 Supplementary Figure 21. DREAM-optimized enhancer displayed stronger ability to  
 968 stimulate the expression of CAG promoter and CMV promoter.

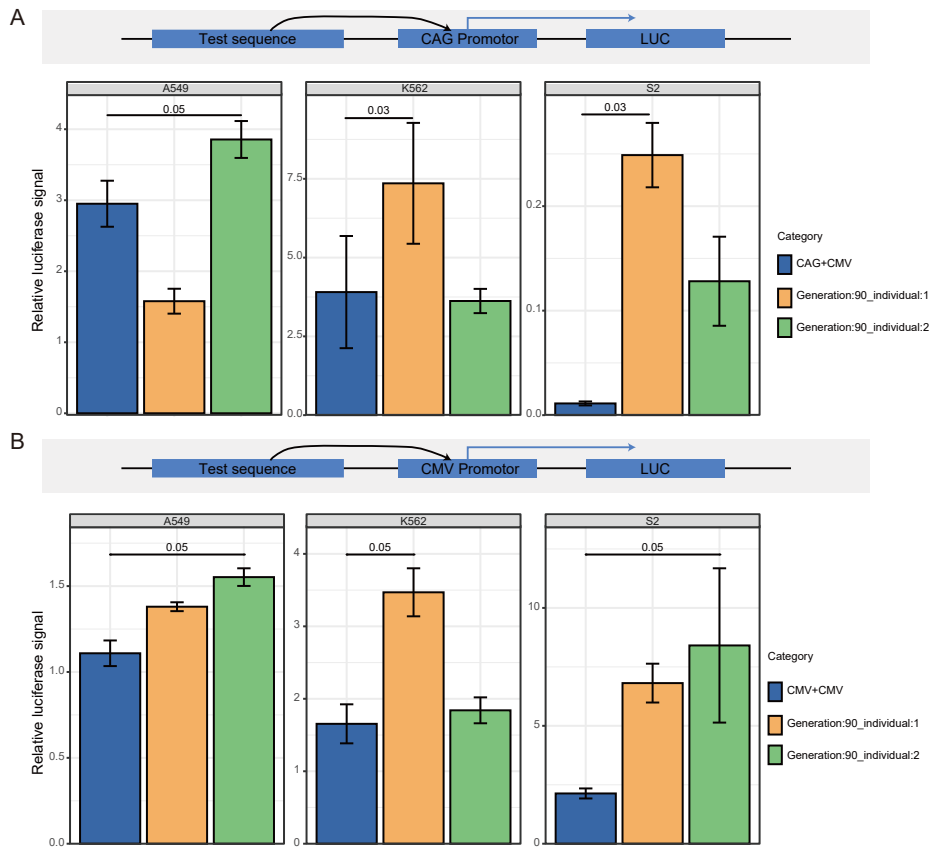

969  
 970 Quantitative comparison of luciferase assay activity levels for the synthetic enhancers  
 971 + CAG promoter (A) and synthetic enhancers + CMV promoter (B) in A549, K562 and  
 972 S2 cell lines. The luciferase values are normalized with the signal of Renilla luciferase.  
 973 Error bars: Standard error of the mean (n = 3 biological replicates; one-sided Wilcoxon  
 974 rank-sum test).  
 975

976 Supplementary Figure 22. Validation of the designed enhancer activity in the  
 977 endogenous chromatin context.

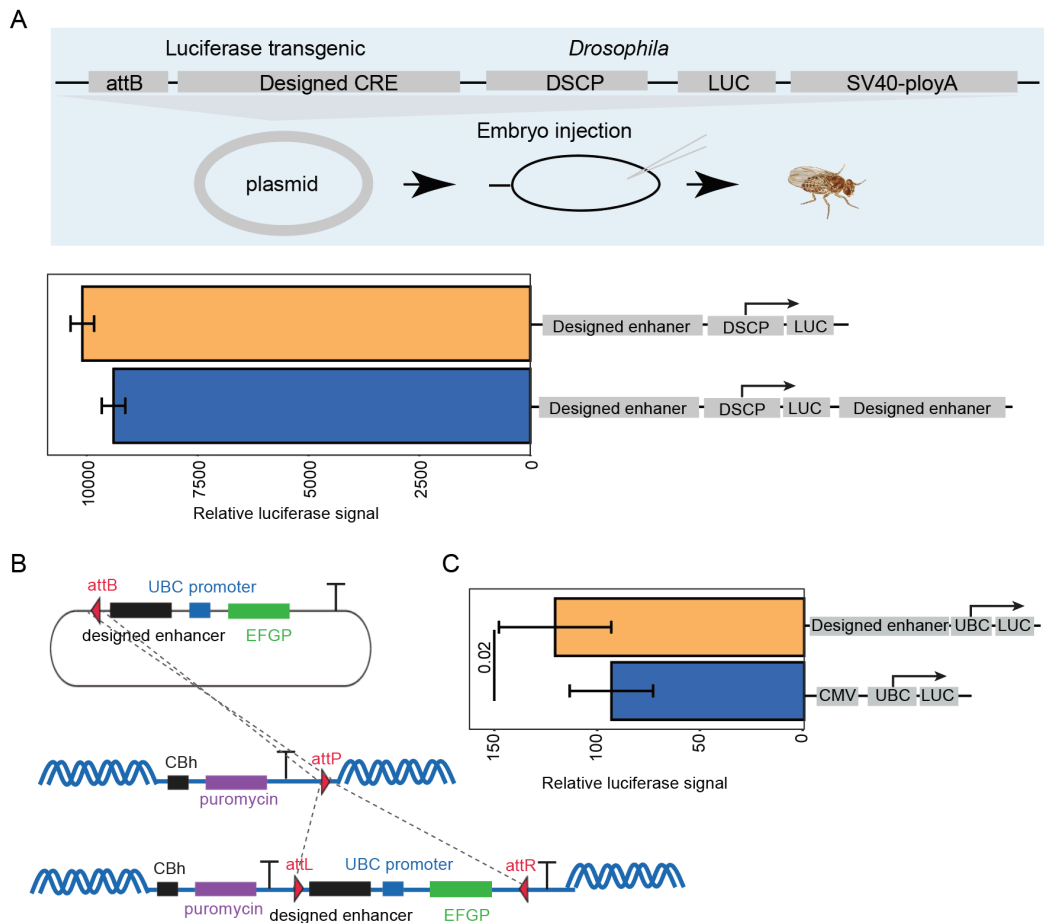

978  
 979 (A) Using the attB/attP site-specific recombination system, luciferase transgenic  
 980 *Drosophila* lines were constructed to validate the activity of the designed enhancer  
 981 (Generation:90\_individual:2). The designed enhancer was inserted both upstream and  
 982 downstream of the DSCP promoter. (B) Schematic illustration of the integration of the  
 983 designed enhancer into the human genome (293T cell line) using the attB/attP site-  
 984 specific recombination system. (C) Validation of the activity of the CMV enhancer and  
 985 the designed enhancer (Generation:79\_individual:2) within the endogenous chromatin  
 986 context of human 293T cells, achieved through recombinase-mediated integration. All  
 987 luciferase values were normalized against the activity of an empty vector containing  
 988 only the corresponding promoter. Error bars represent the standard error of the mean (n  
 989 = 3 biological replicates; one-sided T-test).  
 990

991

992 **Reference**

993 1. de Almeida, B.P., Reiter, F., Pagani, M. and Stark, A. (2022)  
994 DeepSTARR predicts enhancer activity from DNA sequence and enables the  
995 de novo design of synthetic enhancers. *Nat. Genet.*, **54**, 613-624.  
996 2. Yang, Z. (2007) PAML 4: Phylogenetic Analysis by Maximum  
997 Likelihood. *Mol. Biol. Evol.*, **24**, 1586-1591.  
998 3. Clark, A.G., Eisen, M.B., Smith, D.R., Bergman, C.M., Oliver, B.,  
999 Markow, T.A., Kaufman, T.C., Kellis, M., Gelbart, W., Iyer, V.N. *et al.*  
1000 (2007) Evolution of genes and genomes on the Drosophila phylogeny. *Nature*,  
1001 **450**, 203-218.  
1002
